# Supplementary material
Source: PubMed Central journal article supplement (PMC7366452)
Supplement: 12038_2020_69_MOESM1_ESM.pdf [file 12038_2020_69_MOESM1_ESM.pdf]

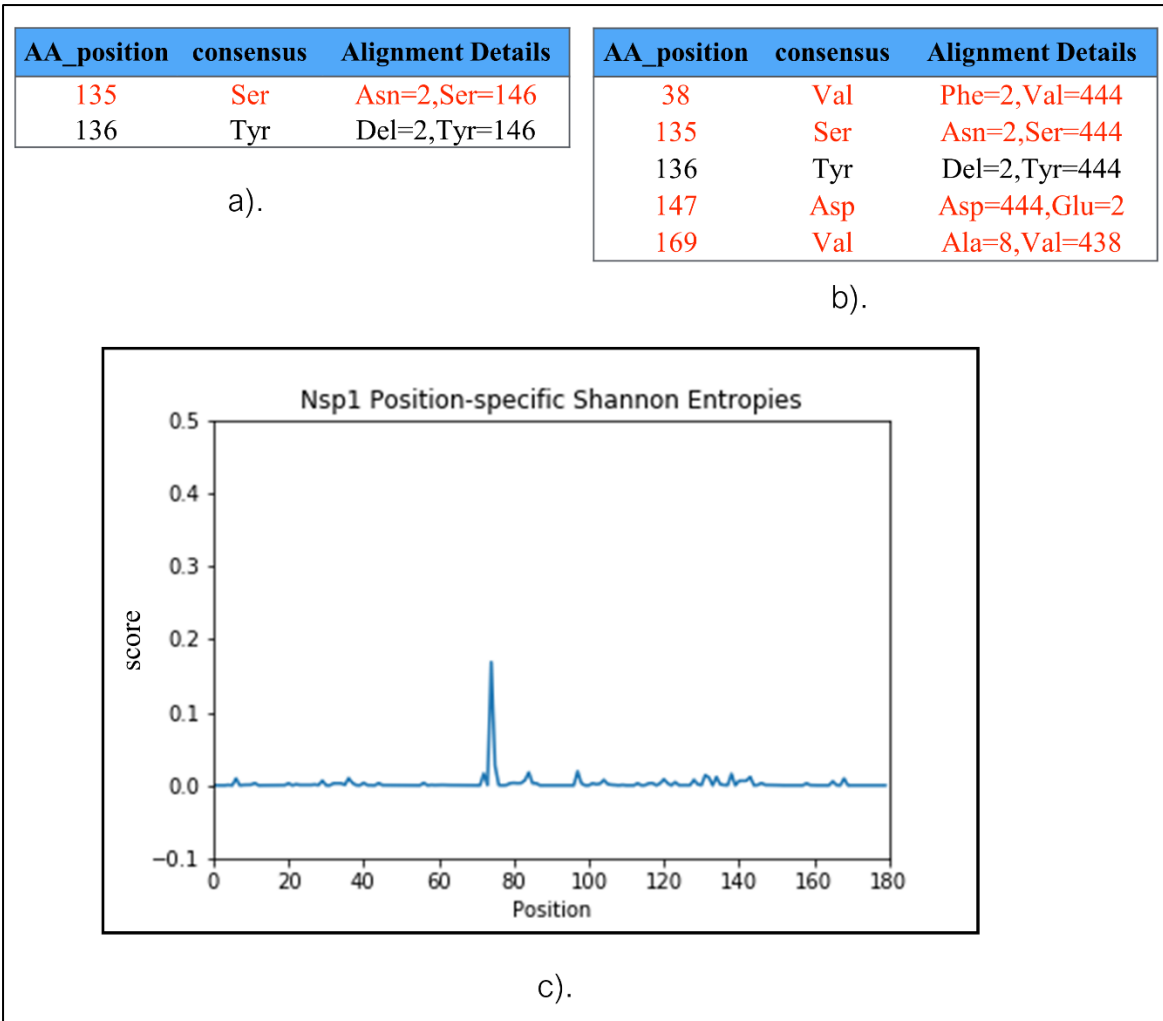

**Supplementary Figure 1:** Mutation analysis of Nsp1 protein sequences. **a)** Table showing Mutated regions in Indian strains till 15 May 2020 **b)** Table showing Mutated regions in Indian strains till 14 June 2020 **c)** Shannon entropy per residue

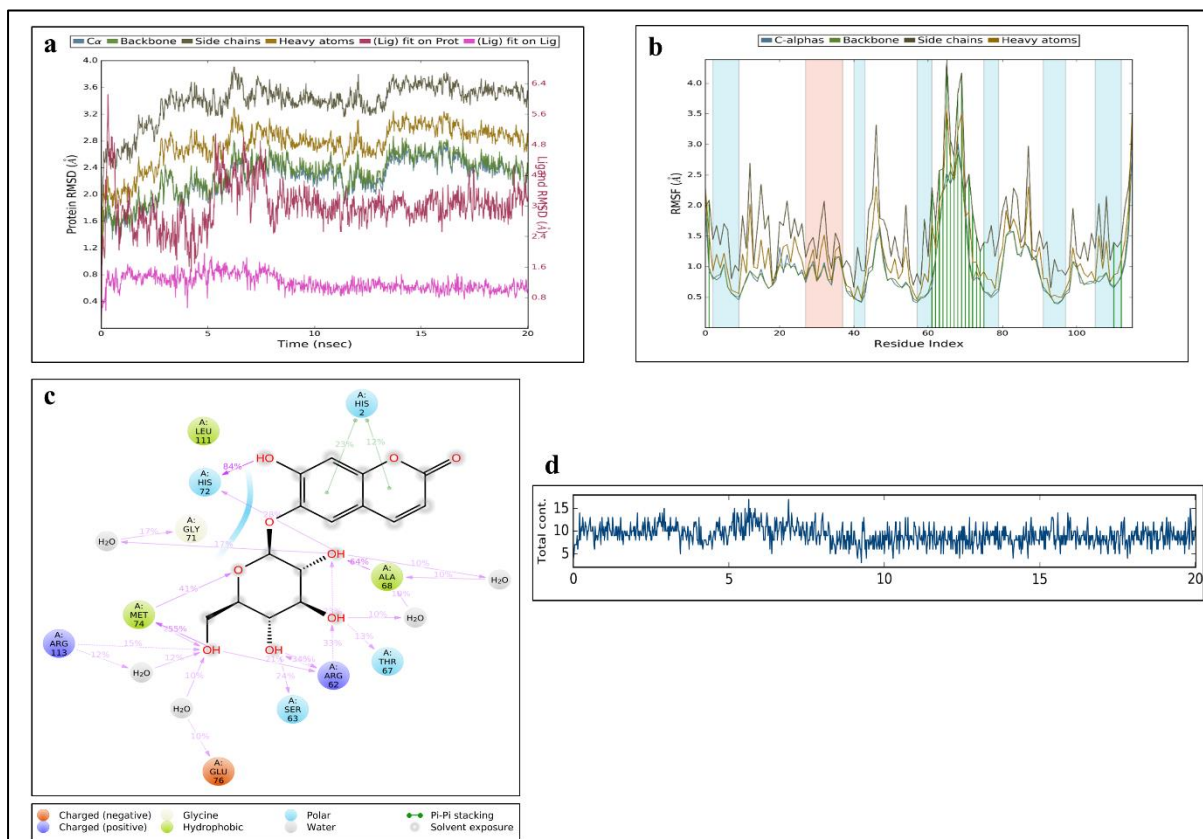

**Supplementary Figure 2:** MD simulation results for Nsp1-deep-Esculin. **a.** RMSD plot of Nsp1 and Esculin. **b.** Nsp1-RMSF plot **c.** Interaction of Esculin atoms with Nsp1 residues along with types and duration of interactions. Interactions that persist for more than 10% of simulation time has been shown. If a residue forms multiple interaction of same type with the same atom of ligand then that residue can have more than 100% interaction **d.** Total number of contacts (H-bonds, Water bridges, Hydrophobic, Ionic) between Nsp1 and Esculin over the course of MD simulation.

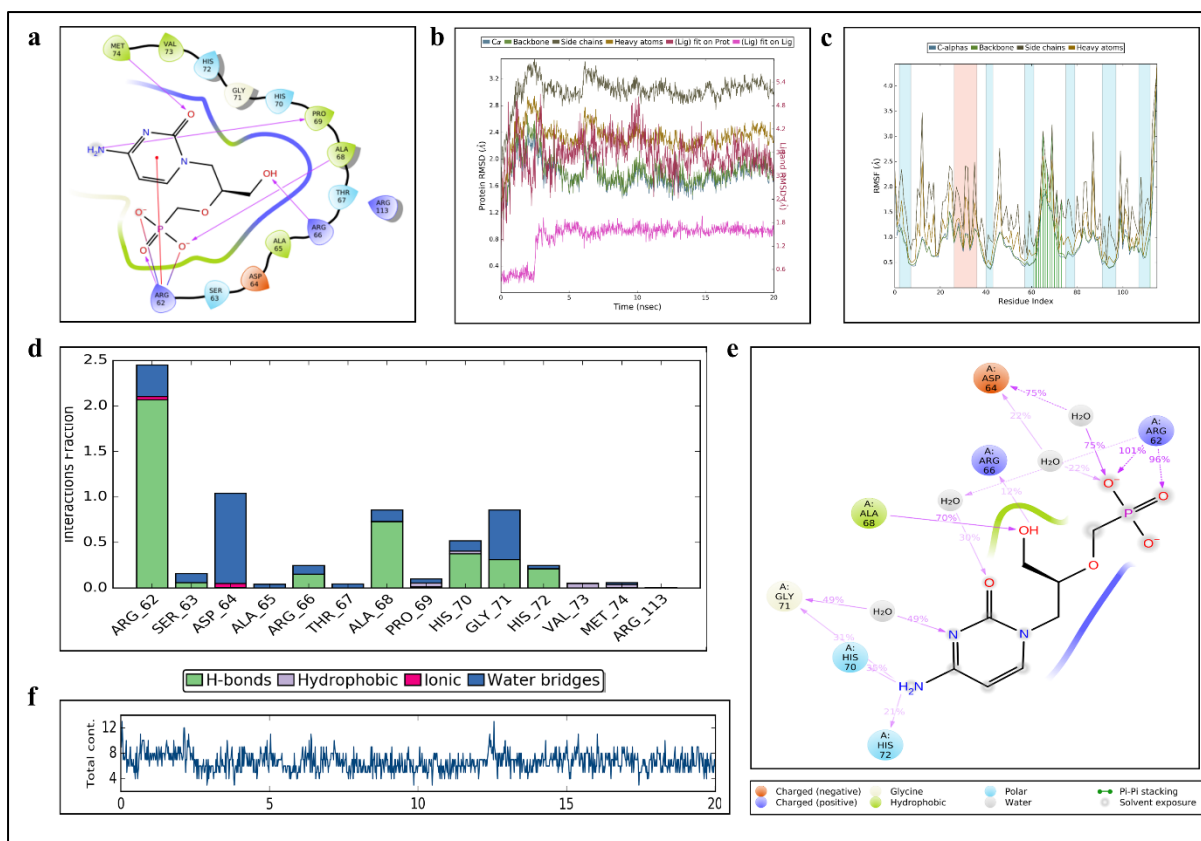

**Supplementary Figure 3:** Docking and MD simulation results for Nsp1-deep-Cidofovir. **a.** Cidofovir-Nsp1 interactions after XP docking **b.** Interaction types and Interacting residues of Nsp1 with Cidofovir over simulation time. Normalized stacked bars indicate the fraction of simulation time for which a particular type of interaction was maintained. Values more than 1.0 suggests that the residue forms multiple interactions of same subtype with ligand (Cidofovir) **c.** RMSD plot of Nsp1 and Cidofovir. **d.** Nsp1-RMSF plot **e.** Interaction of Cidofovir atoms with Nsp1 residues along with types and duration of interactions. Interactions that persist for more than 10% of simulation time has been shown. If a residue forms multiple interaction of same type with the same atom of ligand then that residue can have more than 100% interaction **f.** Total number of contacts (H-bonds, Water bridges, Hydrophobic, Ionic) between Nsp1 and Cidofovir over the course of MD simulation

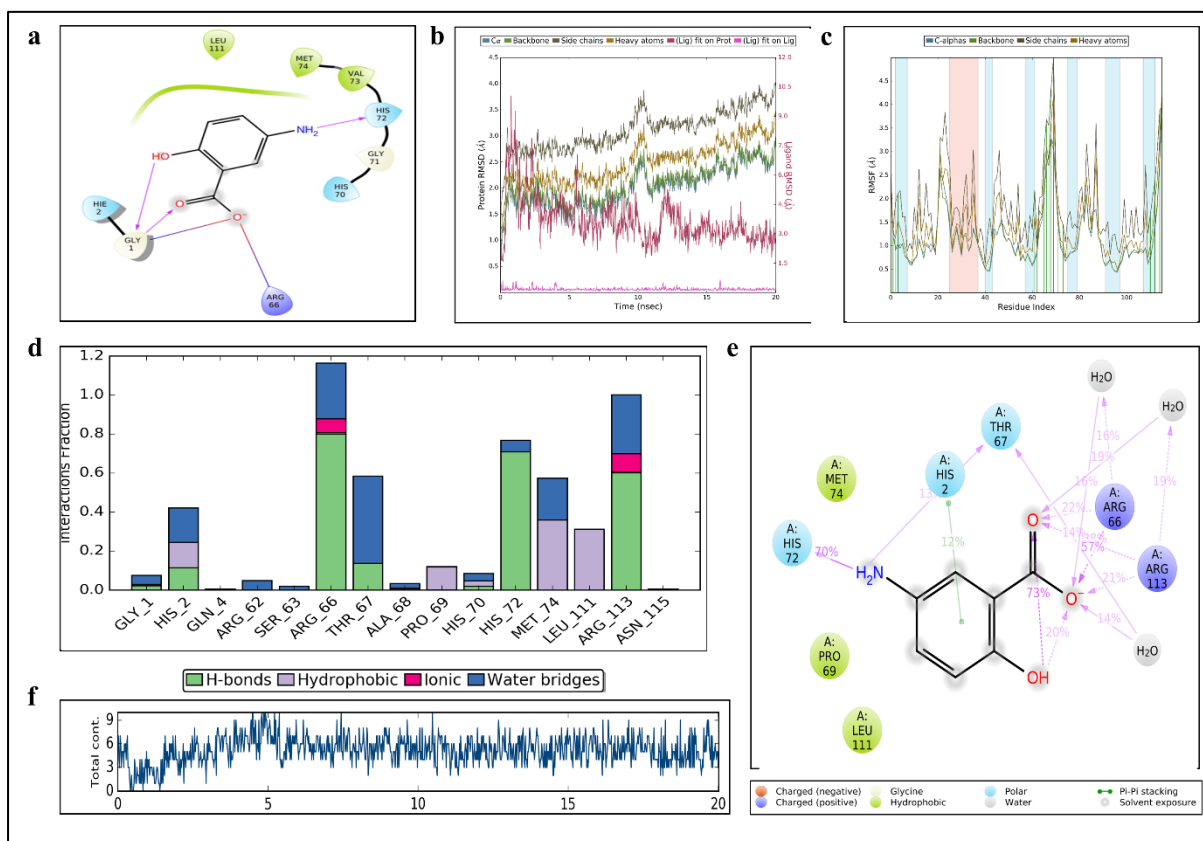

**Supplementary Figure 4:** Docking and MD simulation results for Nsp1-deep-Mesalazine. **a.** Mesalazine -Nsp1 interactions after XP docking **b.** Interaction types and Interacting residues of Nsp1 with Mesalazine over simulation time. Normalized stacked bars indicate the fraction of simulation time for which a particular type of interaction was maintained. Values more than 1.0 suggests that the residue forms multiple interactions of same subtype with ligand (Mesalazine) **c.** RMSD plot of Nsp1 and Mesalazine. **d.** Nsp1-RMSF plot **e.** Interaction of Mesalazine atoms with Nsp1 residues along with types and duration of interactions. Interactions that persist for more than 10% of simulation time has been shown. If a residue forms multiple interaction of same type with the same atom of ligand then that residue can have more than 100% interaction **f.** Total number of contacts (H-bonds, Water bridges, Hydrophobic, Ionic) between Nsp1 and Mesalazine over the course of MD simulation



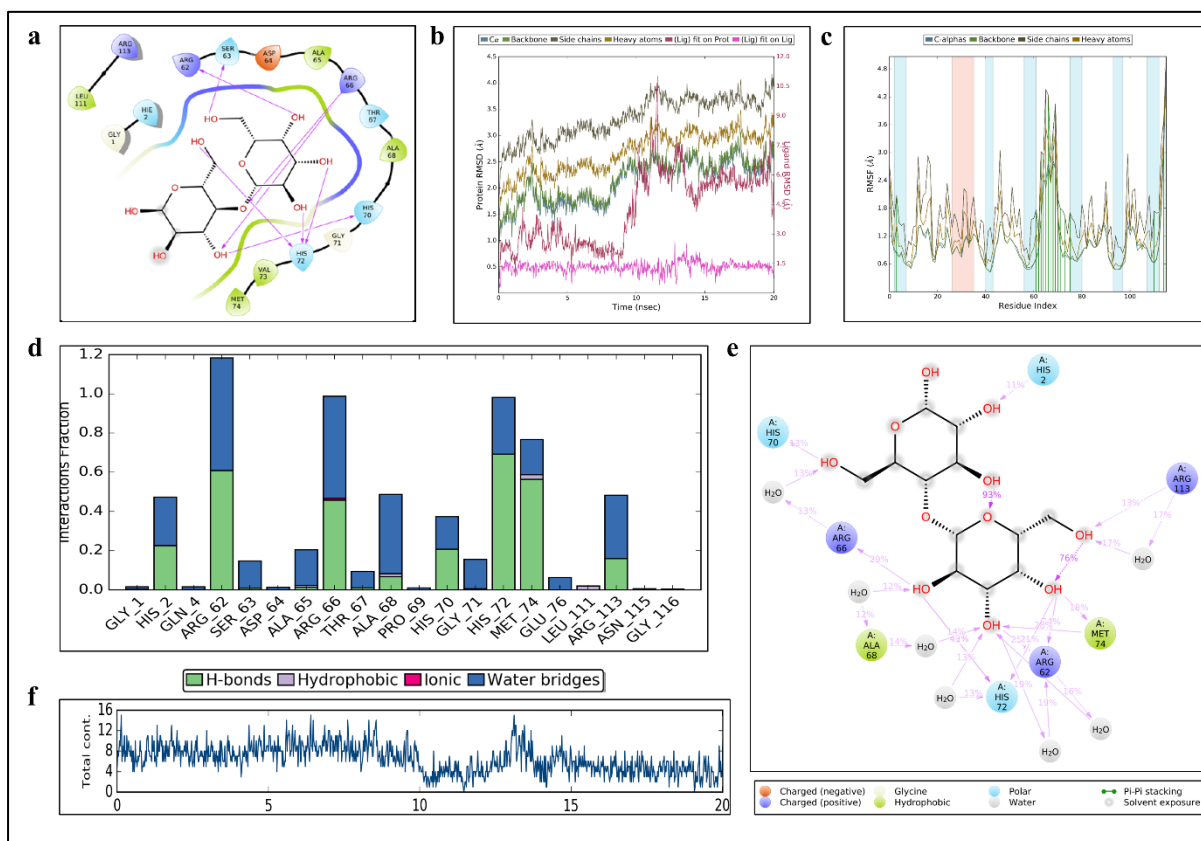

**Supplementary Figure 5: Docking and MD simulation results for Nsp1-deep-Lactose.** **a.** Lactose - Nsp1 interactions after XP docking **b.** Interaction types and Interacting residues of Nsp1 with Lactose over simulation time. Normalized stacked bars indicate the fraction of simulation time for which a particular type of interaction was maintained. Values more than 1.0 suggests that the residue forms multiple interactions of same subtype with ligand (Lactose) **c.** RMSD plot of Nsp1 and Lactose. **d.** Nsp1-RMSF plot **e.** Interaction of Lactose atoms with Nsp1 residues along with types and duration of interactions. Interactions that persist for more than 10% of simulation time has been shown. If a residue forms multiple interaction of same type with the same atom of ligand then that residue can have more than 100% interaction **f.** Total number of contacts (H-bonds, Water bridges, Hydrophobic, Ionic) between Nsp1 and Lactose over the course of MD simulation

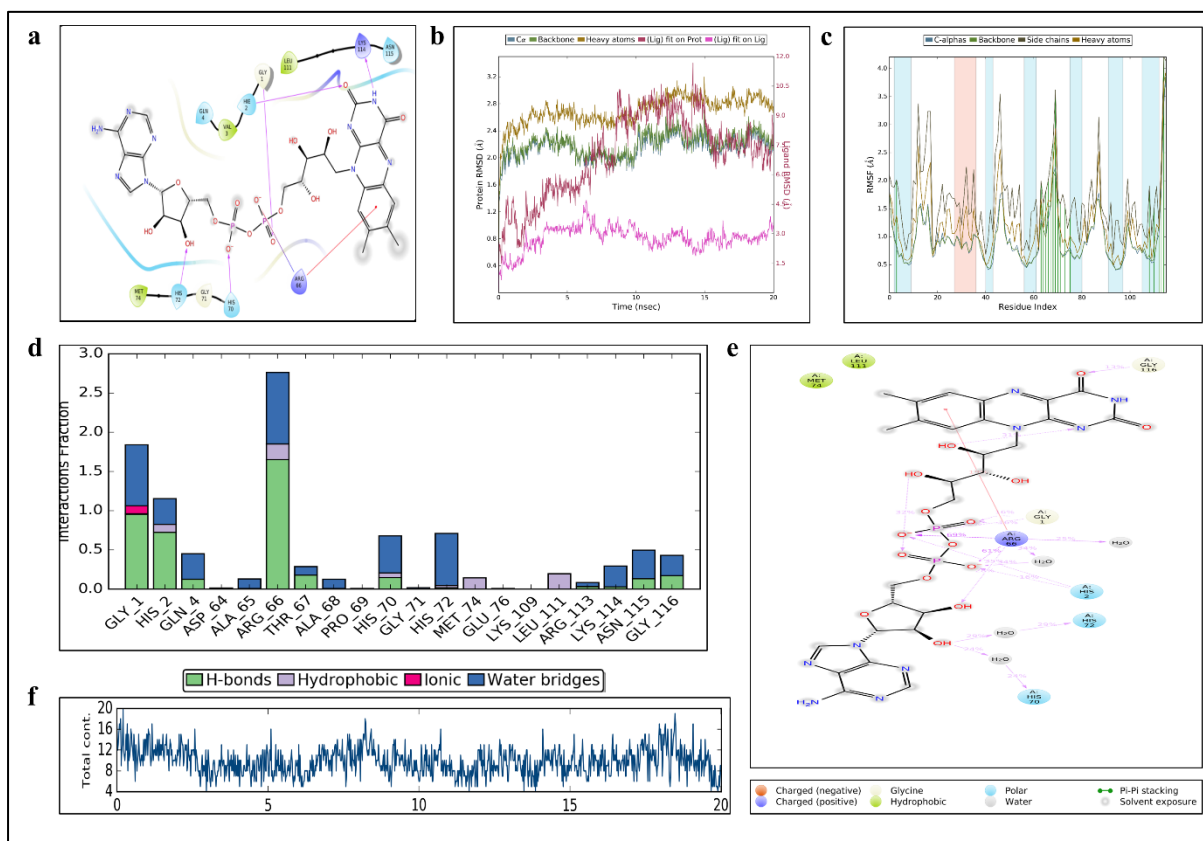

**Supplementary Figure 6: Docking and MD simulation results for Nsp1-deep-FAD. a.** FAD -Nsp1 interactions after XP docking **b.** Interaction types and Interacting residues of Nsp1 with FAD over simulation time. Normalized stacked bars indicate the fraction of simulation time for which a particular type of interaction was maintained. Values more than 1.0 suggests that the residue forms multiple interactions of same subtype with ligand (FAD) **c.** RMSD plot of Nsp1 and FAD. **d.** Nsp1-RMSF plot **e.** Interaction of FAD atoms with Nsp1 residues along with types and duration of interactions. Interactions that persist for more than 10% of simulation time has been shown. If a residue forms multiple interaction of same type with the same atom of ligand then that residue can have more than 100% interaction **f.** Total number of contacts (H-bonds, Water bridges, Hydrophobic, Ionic) between Nsp1 and FAD over the course of MD simulation

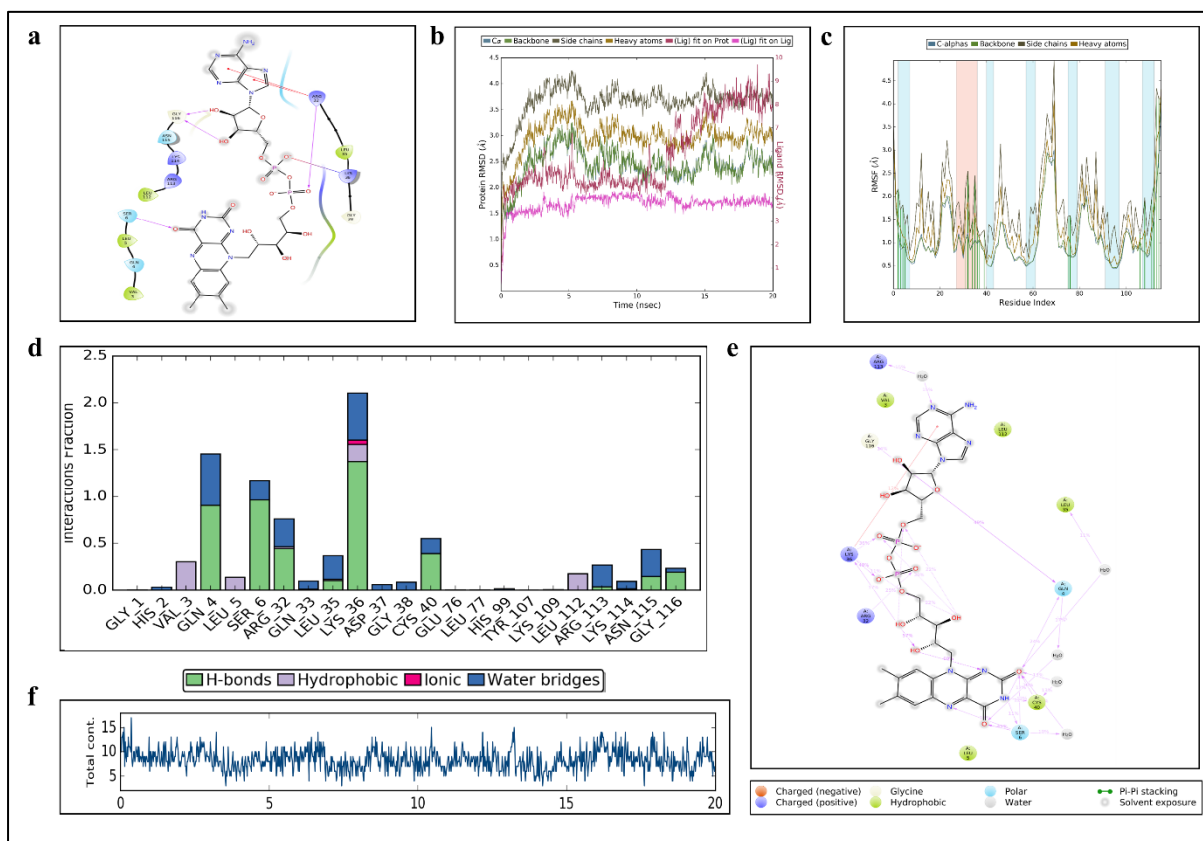

**Supplementary Figure 7:** Docking and MD simulation results for Nsp1-shallow-FAD. **a.** FAD -Nsp1 interactions after XP docking **b.** Interaction types and Interacting residues of Nsp1 with FAD over simulation time. Normalized stacked bars indicate the fraction of simulation time for which a particular type of interaction was maintained. Values more than 1.0 suggests that the residue forms multiple interactions of same subtype with ligand (FAD) **c.** RMSD plot of Nsp1 and FAD. **d.** Nsp1-RMSF plot **e.** Interaction of FAD atoms with Nsp1 residues along with types and duration of interactions. Interactions that persist for more than 10% of simulation time has been shown. If a residue forms multiple interaction of same type with the same atom of ligand then that residue can have more than 100% interaction **f.** Total number of contacts (H-bonds, Water bridges, Hydrophobic, Ionic) between Nsp1 and FAD over the course of MD simulation

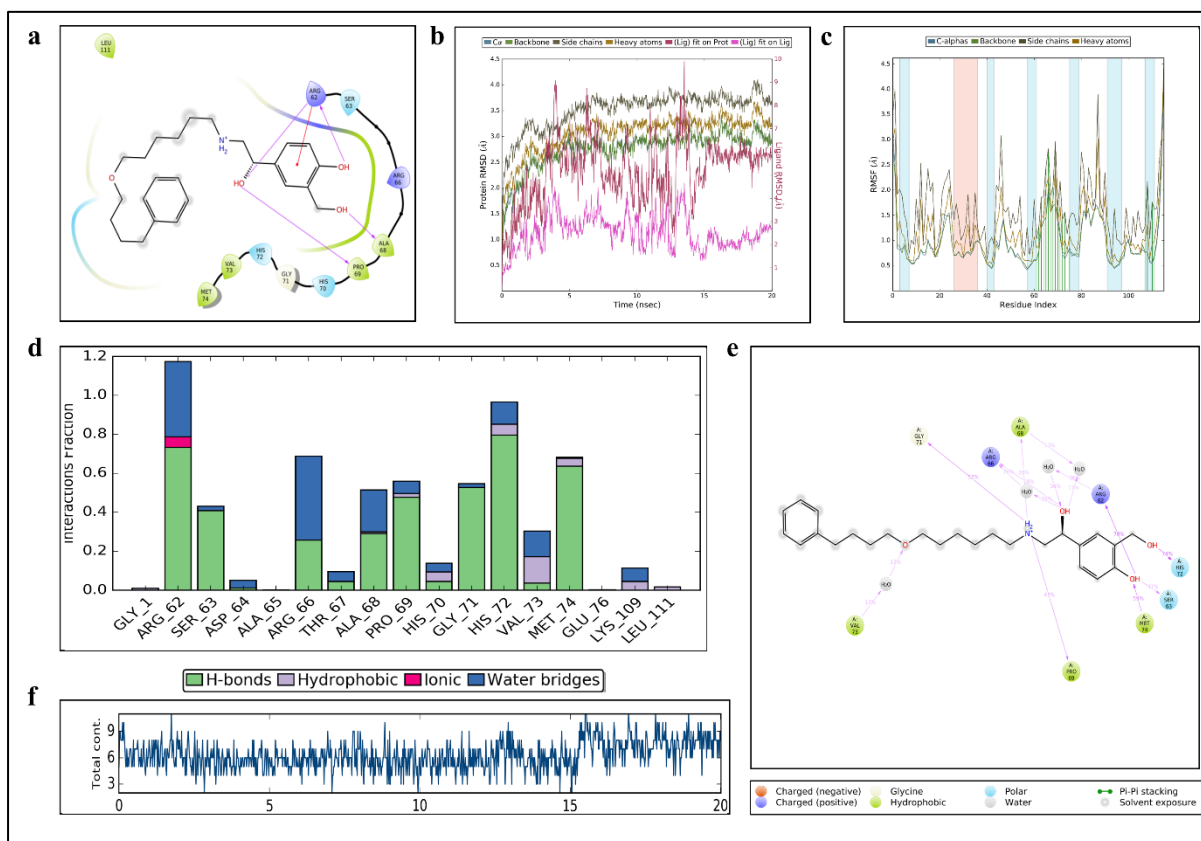

**Supplementary Figure 8:** Docking and MD simulation results for Nsp1-deep-Salmeterol. **a.** Salmeterol -Nsp1 interactions after XP docking **b.** Interaction types and Interacting residues of Nsp1 with Salmeterol over simulation time. Normalized stacked bars indicate the fraction of simulation time for which a particular type of interaction was maintained. Values more than 1.0 suggests that the residue forms multiple interactions of same subtype with ligand (Salmeterol) **c.** RMSD plot of Nsp1 and Salmeterol. **d.** Nsp1-RMSF plot **e.** Interaction of Salmeterol atoms with Nsp1 residues along with types and duration of interactions. Interactions that persist for more than 10% of simulation time has been shown. If a residue forms multiple interaction of same type with the same atom of ligand then that residue can have more than 100% interaction **f.** Total number of contacts (H-bonds, Water bridges, Hydrophobic, Ionic) between Nsp1 and Salmeterol over the course of MD simulation

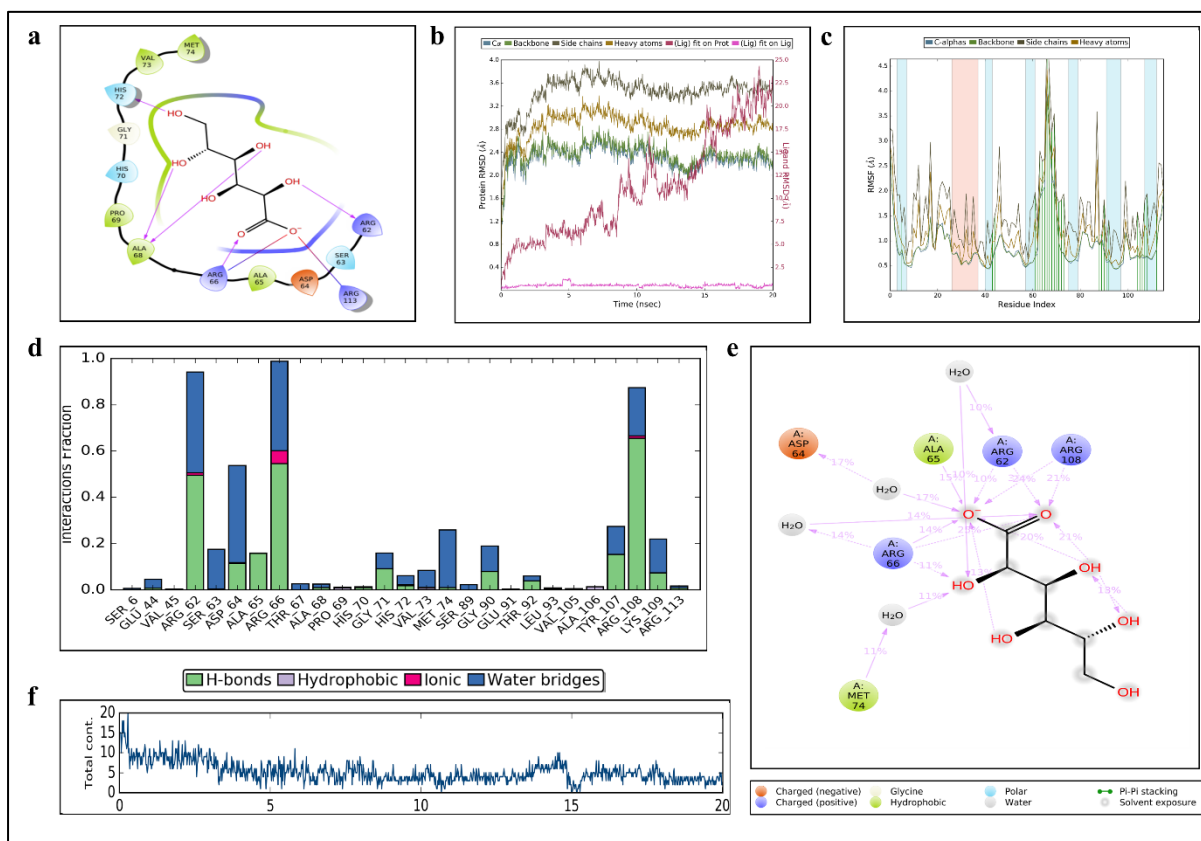

**Supplementary Figure 9:** Docking and MD simulation results for Nsp1-deep-Zinc-Gluconate. **a.** Zinc-Gluconate -Nsp1 interactions after XP docking **b.** Interaction types and Interacting residues of Nsp1 with Zinc-Gluconate over simulation time. Normalized stacked bars indicate the fraction of simulation time for which a particular type of interaction was maintained. Values more than 1.0 suggests that the residue forms multiple interactions of same subtype with ligand (Zinc-Gluconate) **c.** RMSD plot of Nsp1 and Zinc-Gluconate. **d.** Nsp1-RMSF plot **e.** Interaction of Zinc-Gluconate atoms with Nsp1 residues along with types and duration of interactions. Interactions that persist for more than 10% of simulation time has been shown. If a residue forms multiple interaction of same type with the same atom of ligand then that residue can have more than 100% interaction **f.** Total number of contacts (H-bonds, Water bridges, Hydrophobic, Ionic) between Nsp1 and Zinc-Gluconate over the course of MD simulation

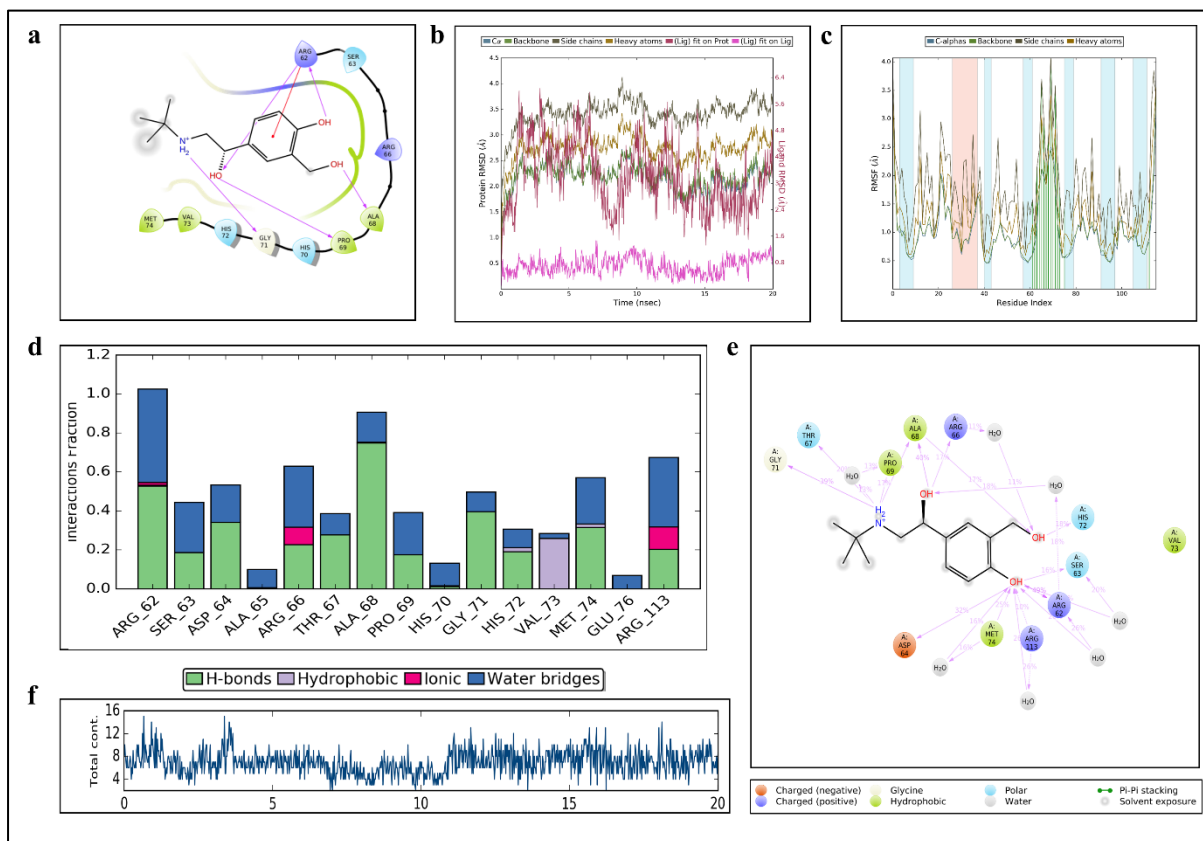

**Supplementary Figure 10:** Docking and MD simulation results for Nsp1-deep-Salbutamol. **a.** Salbutamol -Nsp1 interactions after XP docking **b.** Interaction types and Interacting residues of Nsp1 with Salbutamol over simulation time. Normalized stacked bars indicate the fraction of simulation time for which a particular type of interaction was maintained. Values more than 1.0 suggests that the residue forms multiple interactions of same subtype with ligand (Salbutamol) **c.** RMSD plot of Nsp1 and Salbutamol. **d.** Nsp1-RMSF plot **e.** Interaction of Salbutamol atoms with Nsp1 residues along with types and duration of interactions. Interactions that persist for more than 10% of simulation time has been shown. If a residue forms multiple interaction of same type with the same atom of ligand then that residue can have more than 100% interaction **f.** Total number of contacts (H-bonds, Water bridges, Hydrophobic, Ionic) between Nsp1 and Salbutamol over the course of MD simulation

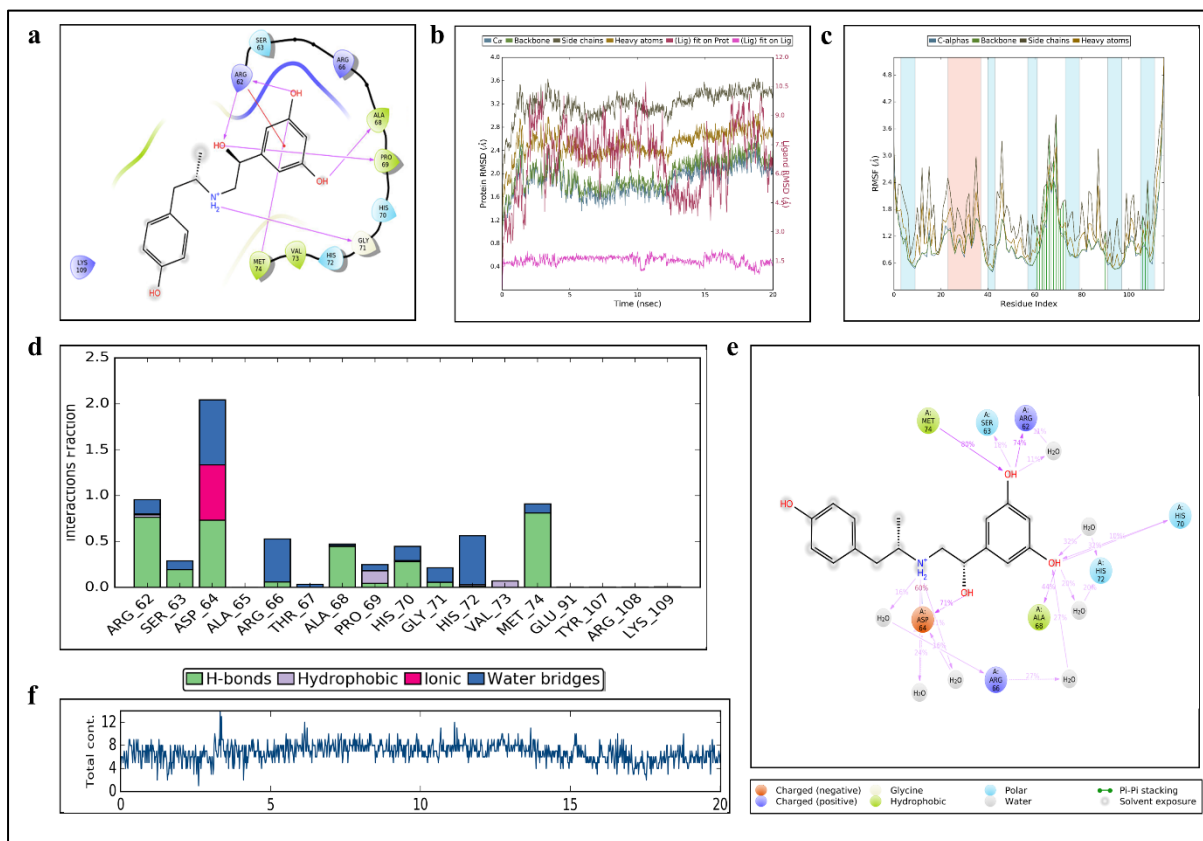

**Supplementary Figure 11: Docking and MD simulation results for Nsp1-deep-Fenoterol.** **a.** Fenoterol-Nsp1 interactions after XP docking **b.** Interaction types and Interacting residues of Nsp1 with Fenoterol over simulation time. Normalized stacked bars indicate the fraction of simulation time for which a particular type of interaction was maintained. Values more than 1.0 suggests that the residue forms multiple interactions of same subtype with ligand (Fenoterol) **c.** RMSD plot of Nsp1 and Fenoterol. **d.** Nsp1-RMSF plot **e.** Interaction of Fenoterol atoms with Nsp1 residues along with types and duration of interactions. Interactions that persist for more than 10% of simulation time has been shown. If a residue forms multiple interaction of same type with the same atom of ligand then that residue can have more than 100% interaction **f.** Total number of contacts (H-bonds, Water bridges, Hydrophobic, Ionic) between Nsp1 and Fenoterol over the course of MD simulation



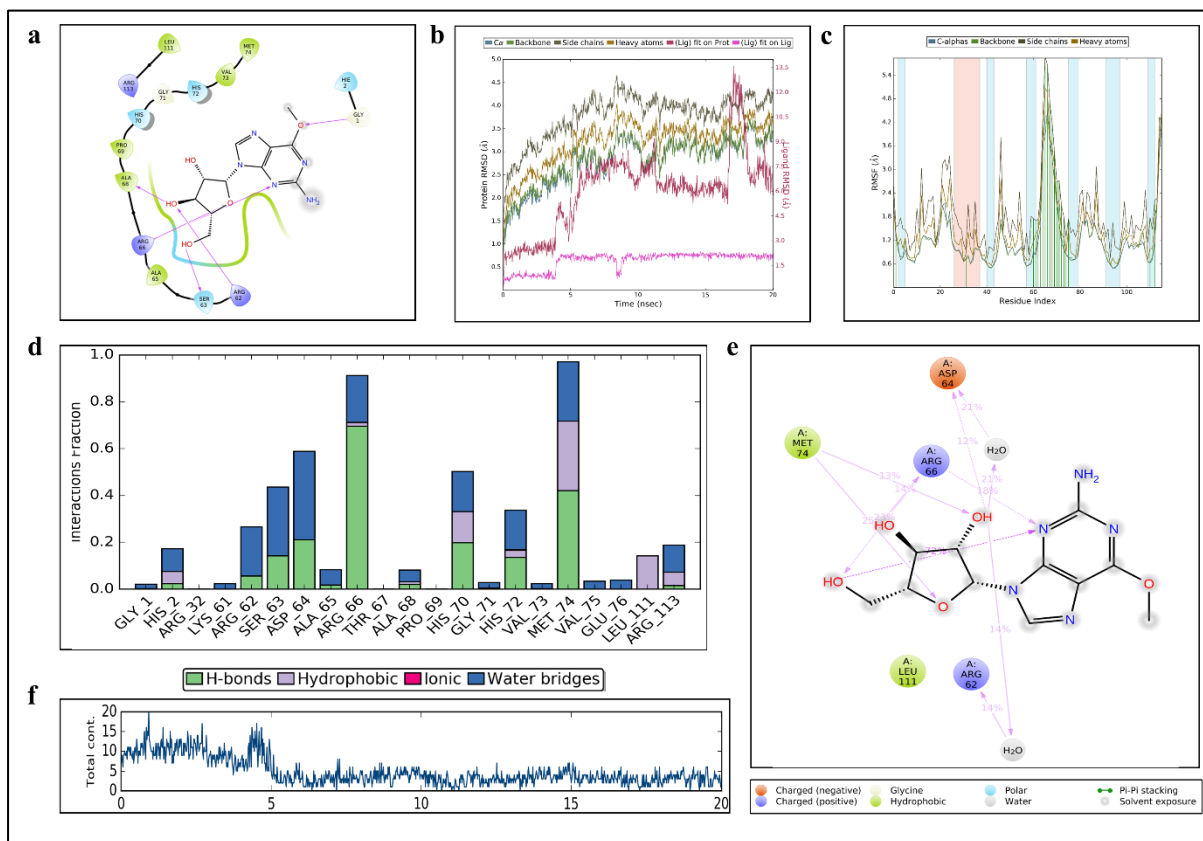

**Supplementary Figure 12:** Docking and MD simulation results for Nsp1-deep-Nelarabine. **a.** Nelarabine -Nsp1 interactions after XP docking **b.** Interaction types and Interacting residues of Nsp1 with Nelarabine over simulation time. Normalized stacked bars indicate the fraction of simulation time for which a particular type of interaction was maintained. Values more than 1.0 suggests that the residue forms multiple interactions of same subtype with ligand (Nelarabine) **c.** RMSD plot of Nsp1 and Nelarabine. **d.** Nsp1-RMSF plot **e.** Interaction of Nelarabine atoms with Nsp1 residues along with types and duration of interactions. Interactions that persist for more than 10% of simulation time has been shown. If a residue forms multiple interaction of same type with the same atom of ligand then that residue can have more than 100% interaction **f.** Total number of contacts (H-bonds, Water bridges, Hydrophobic, Ionic) between Nsp1 and Nelarabine over the course of MD simulation



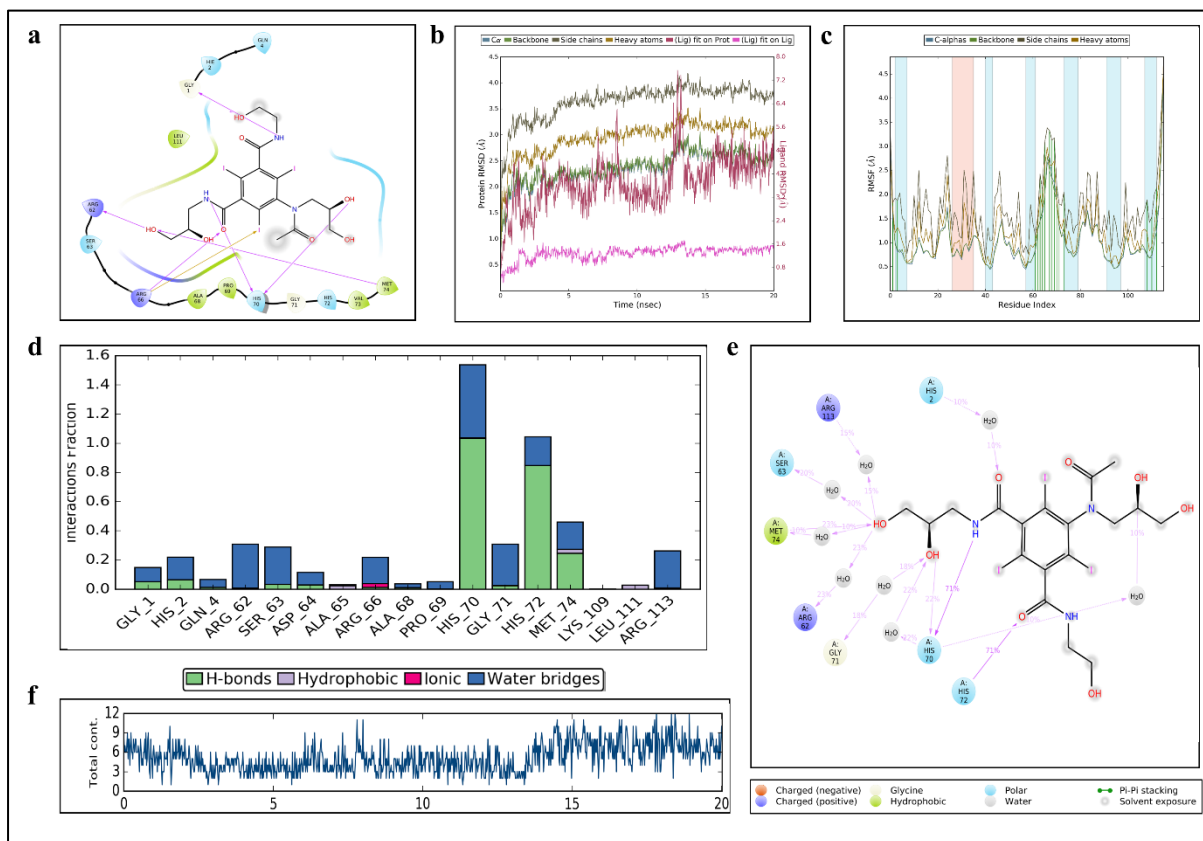

**Supplementary Figure 13:** Docking and MD simulation results for Nsp1-deep-Ioxilan. **a.** Ioxilan - Nsp1 interactions after XP docking **b.** Interaction types and Interacting residues of Nsp1 with Ioxilan over simulation time. Normalized stacked bars indicate the fraction of simulation time for which a particular type of interaction was maintained. Values more than 1.0 suggests that the residue forms multiple interactions of same subtype with ligand (Ioxilan) **c.** RMSD plot of Nsp1 and Ioxilan. **d.** Nsp1-RMSF plot **e.** Interaction of Ioxilan atoms with Nsp1 residues along with types and duration of interactions. Interactions that persist for more than 10% of simulation time has been shown. If a residue forms multiple interaction of same type with the same atom of ligand then that residue can have more than 100% interaction **f.** Total number of contacts (H-bonds, Water bridges, Hydrophobic, Ionic) between Nsp1 and Ioxilan over the course of MD simulation

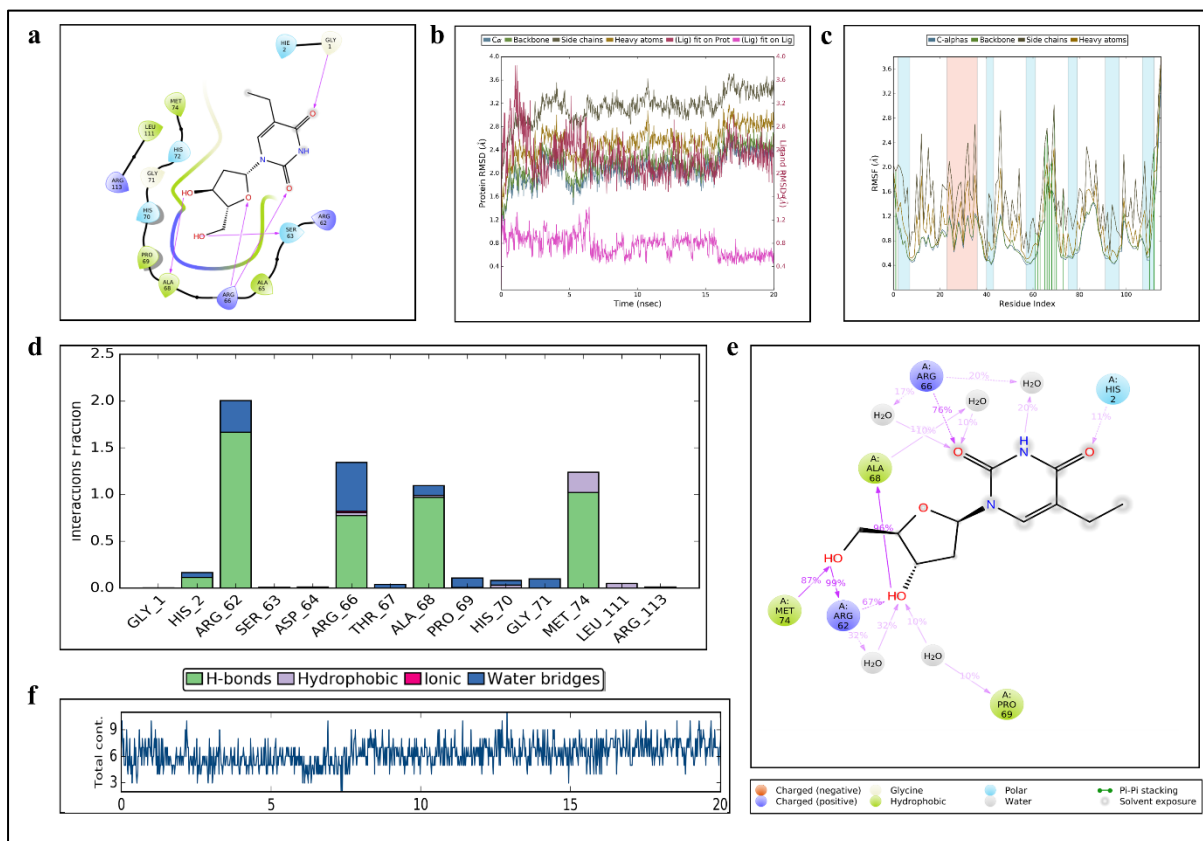

**Supplementary Figure 14:** Docking and MD simulation results for Nsp1-deep-Edoxudine. **a.** Edoxudine -Nsp1 interactions after XP docking **b.** Interaction types and Interacting residues of Nsp1 with Edoxudine over simulation time. Normalized stacked bars indicate the fraction of simulation time for which a particular type of interaction was maintained. Values more than 1.0 suggests that the residue forms multiple interactions of same subtype with ligand (Edoxudine) **c.** RMSD plot of Nsp1 and Edoxudine. **d.** Nsp1-RMSF plot **e.** Interaction of Edoxudine atoms with Nsp1 residues along with types and duration of interactions. Interactions that persist for more than 10% of simulation time has been shown. If a residue forms multiple interaction of same type with the same atom of ligand then that residue can have more than 100% interaction **f.** Total number of contacts (H-bonds, Water bridges, Hydrophobic, Ionic) between Nsp1 and Edoxudine over the course of MD simulation

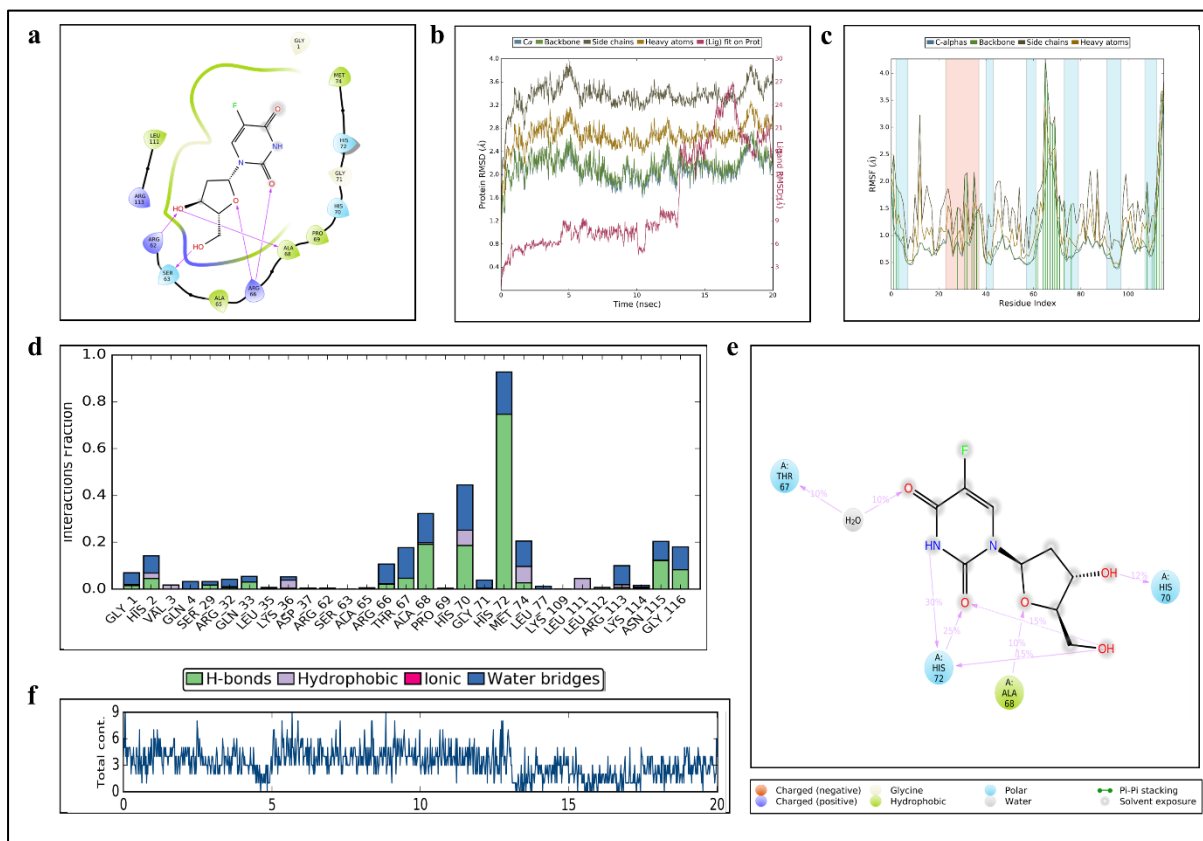

**Supplementary Figure 15:** Docking and MD simulation results for Nsp1-deep-Floxuridine. **a.** Floxuridine -Nsp1 interactions after XP docking **b.** Interaction types and Interacting residues of Nsp1 with Floxuridine over simulation time. Normalized stacked bars indicate the fraction of simulation time for which a particular type of interaction was maintained. Values more than 1.0 suggests that the residue forms multiple interactions of same subtype with ligand (Floxuridine) **c.** RMSD plot of Nsp1 and Floxuridine. **d.** Nsp1-RMSF plot **e.** Interaction of Floxuridine atoms with Nsp1 residues along with types and duration of interactions. Interactions that persist for more than 10% of simulation time has been shown. If a residue forms multiple interaction of same type with the same atom of ligand then that residue can have more than 100% interaction **f.** Total number of contacts (H-bonds, Water bridges, Hydrophobic, Ionic) between Nsp1 and Floxuridine over the course of MD simulation

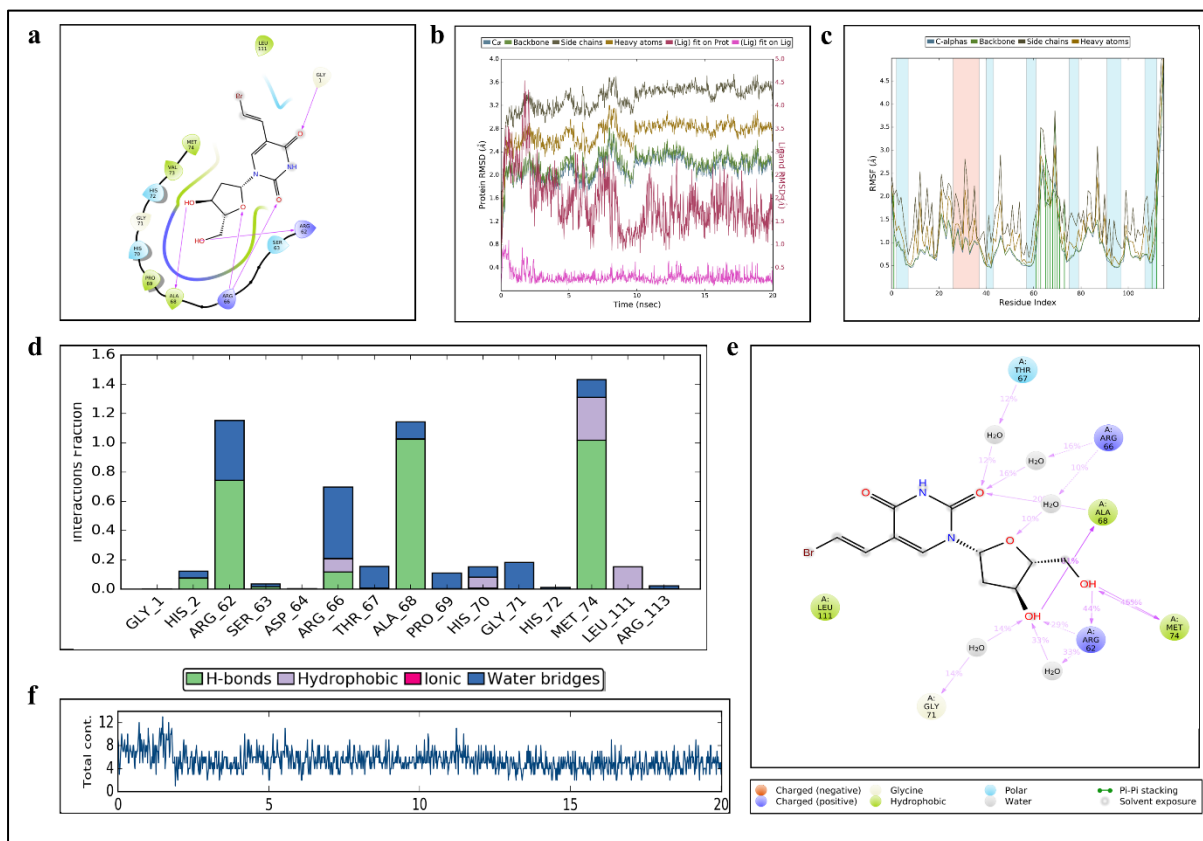

**Supplementary Figure 16:** Docking and MD simulation results for Nsp1-deep-Brivudine. **a.** Brivudine-Nsp1 interactions after XP docking **b.** Interaction types and Interacting residues of Nsp1 with Brivudine over simulation time. Normalized stacked bars indicate the fraction of simulation time for which a particular type of interaction was maintained. Values more than 1.0 suggests that the residue forms multiple interactions of same subtype with ligand (Brivudine) **c.** RMSD plot of Nsp1 and Brivudine. **d.** Nsp1-RMSF plot **e.** Interaction of Brivudine atoms with Nsp1 residues along with types and duration of interactions. Interactions that persist for more than 10% of simulation time has been shown. If a residue forms multiple interaction of same type with the same atom of ligand then that residue can have more than 100% interaction **f.** Total number of contacts (H-bonds, Water bridges, Hydrophobic, Ionic) between Nsp1 and Brivudine over the course of MD simulation

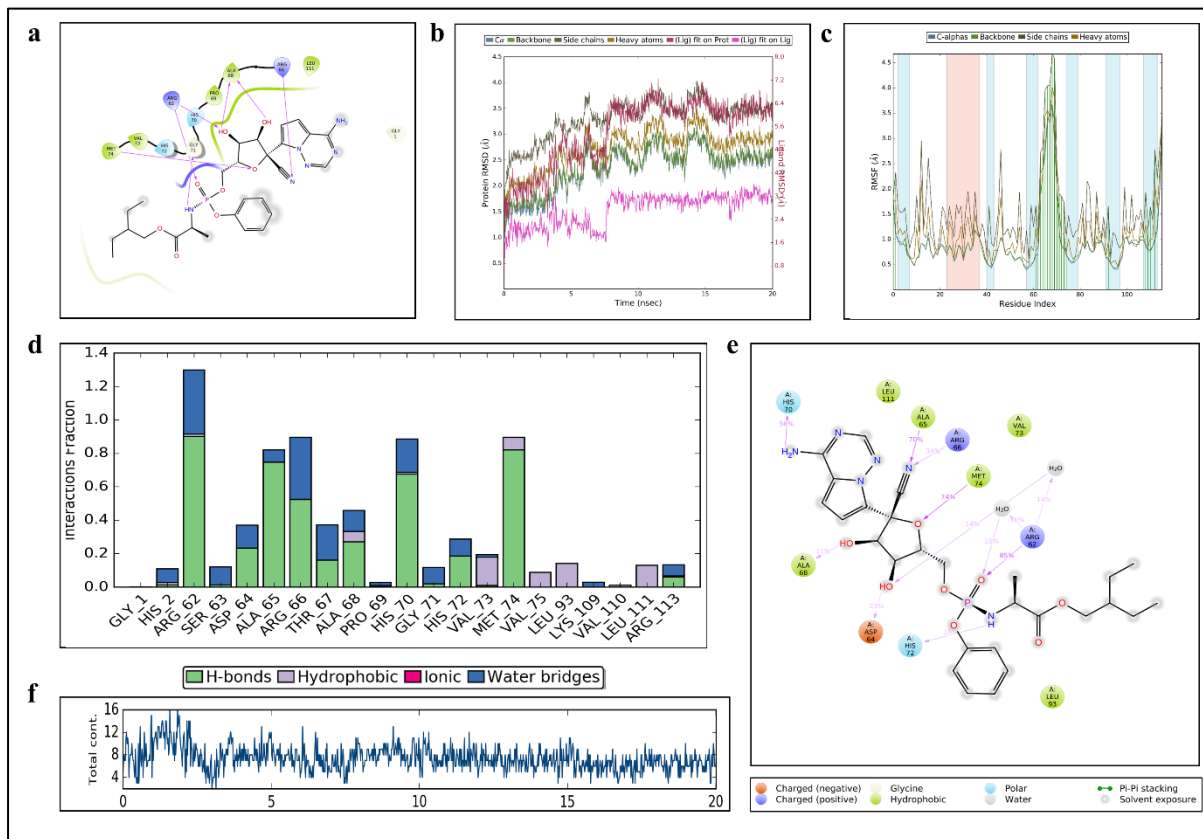

**Supplementary Figure 17:** Docking and MD simulation results for Nsp1-deep-Remdesivir. **a.** Remdesivir -Nsp1 interactions after XP docking **b.** Interaction types and Interacting residues of Nsp1 with Remdesivir over simulation time. Normalized stacked bars indicate the fraction of simulation time for which a particular type of interaction was maintained. Values more than 1.0 suggests that the residue forms multiple interactions of same subtype with ligand (Remdesivir) **c.** RMSD plot of Nsp1 and Remdesivir. **d.** Nsp1-RMSF plot **e.** Interaction of Remdesivir atoms with Nsp1 residues along with types and duration of interactions. Interactions that persist for more than 10% of simulation time has been shown. If a residue forms multiple interaction of same type with the same atom of ligand then that residue can have more than 100% interaction **f.** Total number of contacts (H-bonds, Water bridges, Hydrophobic, Ionic) between Nsp1 and Remdesivir over the course of MD simulation

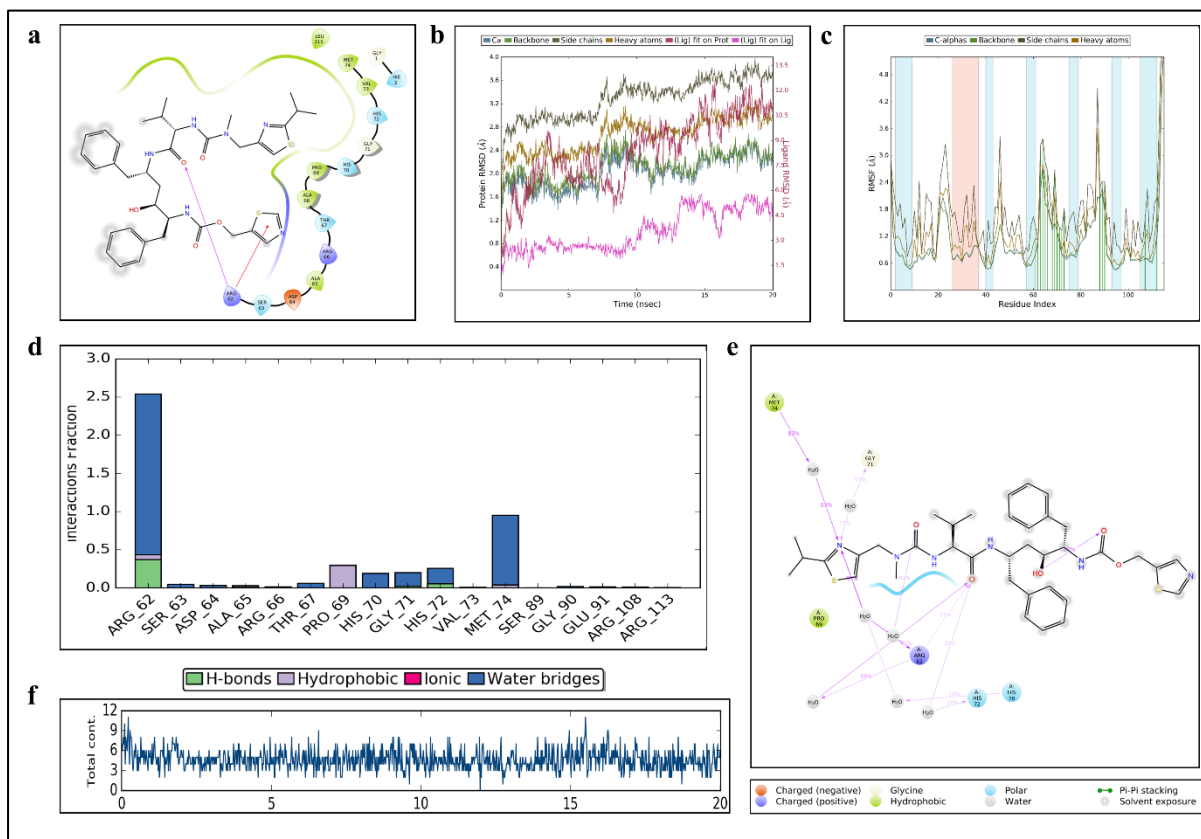

**Supplementary Figure 18:** Docking and MD simulation results for Nsp1-deep-Ritonavir. **a.** Ritonavir -Nsp1 interactions after XP docking **b.** Interaction types and Interacting residues of Nsp1 with Ritonavir over simulation time. Normalized stacked bars indicate the fraction of simulation time for which a particular type of interaction was maintained. Values more than 1.0 suggests that the residue forms multiple interactions of same subtype with ligand (Ritonavir) **c.** RMSD plot of Nsp1 and Ritonavir. **d.** Nsp1-RMSF plot **e.** Interaction of Ritonavir atoms with Nsp1 residues along with types and duration of interactions. Interactions that persist for more than 10% of simulation time has been shown. If a residue forms multiple interaction of same type with the same atom of ligand then that residue can have more than 100% interaction **f.** Total number of contacts (H-bonds, Water bridges, Hydrophobic, Ionic) between Nsp1 and Ritonavir over the course of MD simulation

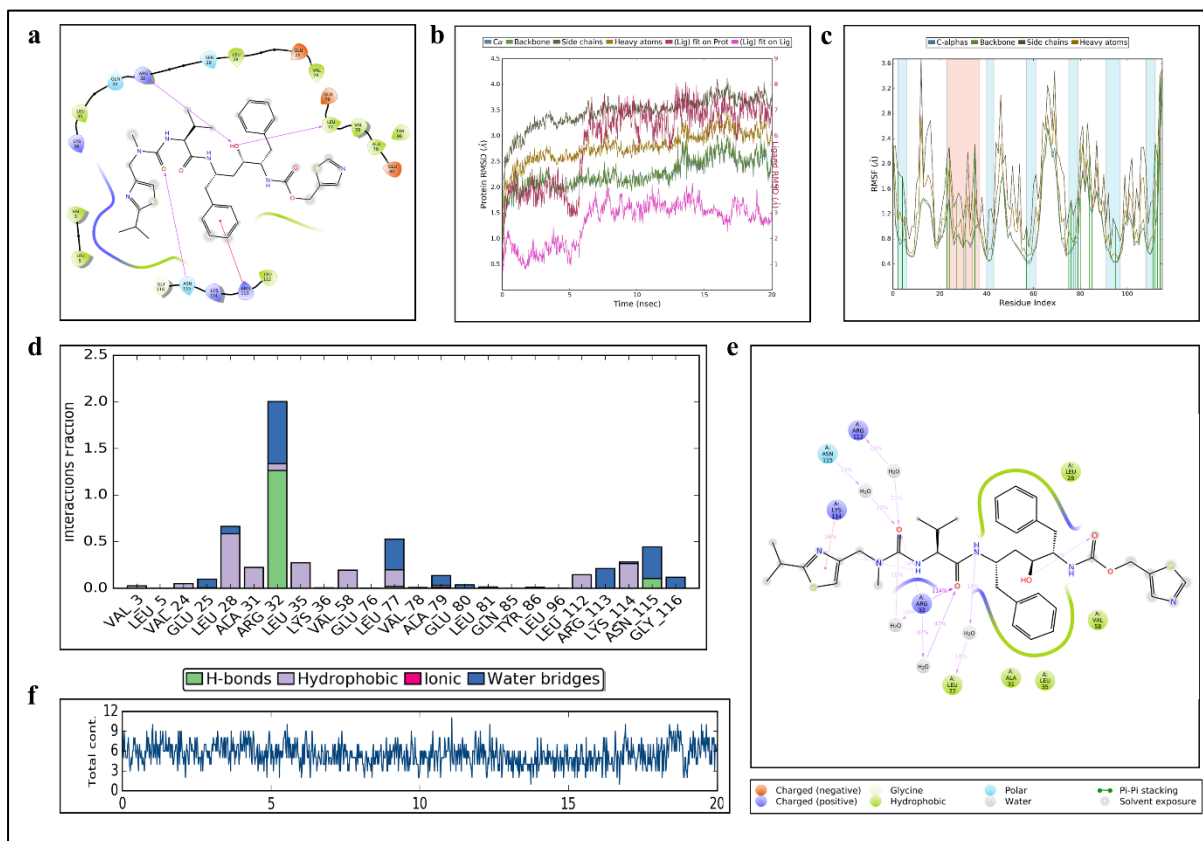

**Supplementary Figure 19:** Docking and MD simulation results for Nsp1-shallow-Ritonavir. **a.** Ritonavir -Nsp1 interactions after XP docking **b.** Interaction types and Interacting residues of Nsp1 with Ritonavir over simulation time. Normalized stacked bars indicate the fraction of simulation time for which a particular type of interaction was maintained. Values more than 1.0 suggests that the residue forms multiple interactions of same subtype with ligand (Ritonavir) **c.** RMSD plot of Nsp1 and Ritonavir. **d.** Nsp1-RMSF plot **e.** Interaction of Ritonavir atoms with Nsp1 residues along with types and duration of interactions. Interactions that persist for more than 10% of simulation time has been shown. If a residue forms multiple interaction of same type with the same atom of ligand then that residue can have more than 100% interaction **f.** Total number of contacts (H-bonds, Water bridges, Hydrophobic, Ionic) between Nsp1 and Ritonavir over the course of MD simulation

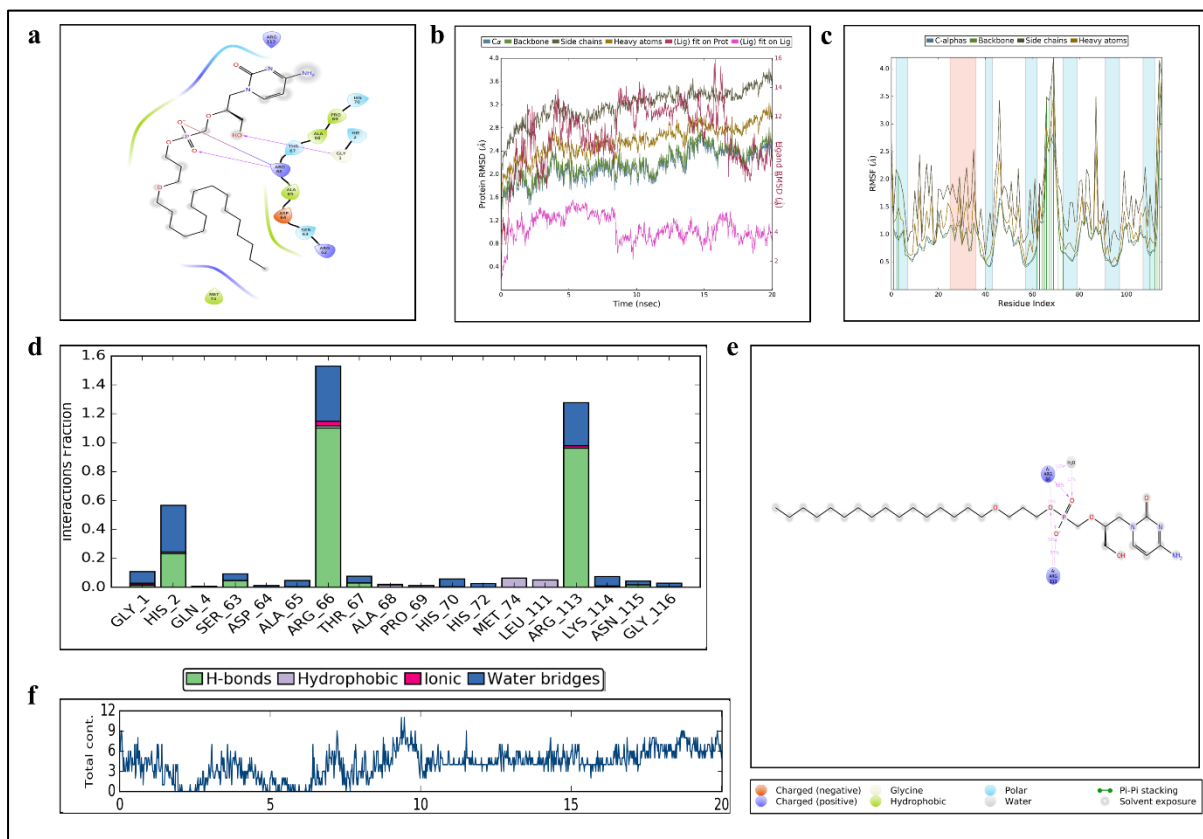

**Supplementary Figure 20:** Docking and MD simulation results for Nsp1-deep-Brincidofovir. **a.** Brincidofovir -Nsp1 interactions after XP docking **b.** Interaction types and Interacting residues of Nsp1 with Brincidofovir over simulation time. Normalized stacked bars indicate the fraction of simulation time for which a particular type of interaction was maintained. Values more than 1.0 suggests that the residue forms multiple interactions of same subtype with ligand (Brincidofovir) **c.** RMSD plot of Nsp1 and Brincidofovir. **d.** Nsp1-RMSF plot **e.** Interaction of Brincidofovir atoms with Nsp1 residues along with types and duration of interactions. Interactions that persist for more than 10% of simulation time has been shown. If a residue forms multiple interaction of same type with the same atom of ligand then that residue can have more than 100% interaction **f.** Total number of contacts (H-bonds, Water bridges, Hydrophobic, Ionic) between Nsp1 and Brincidofovir over the course of MD simulation



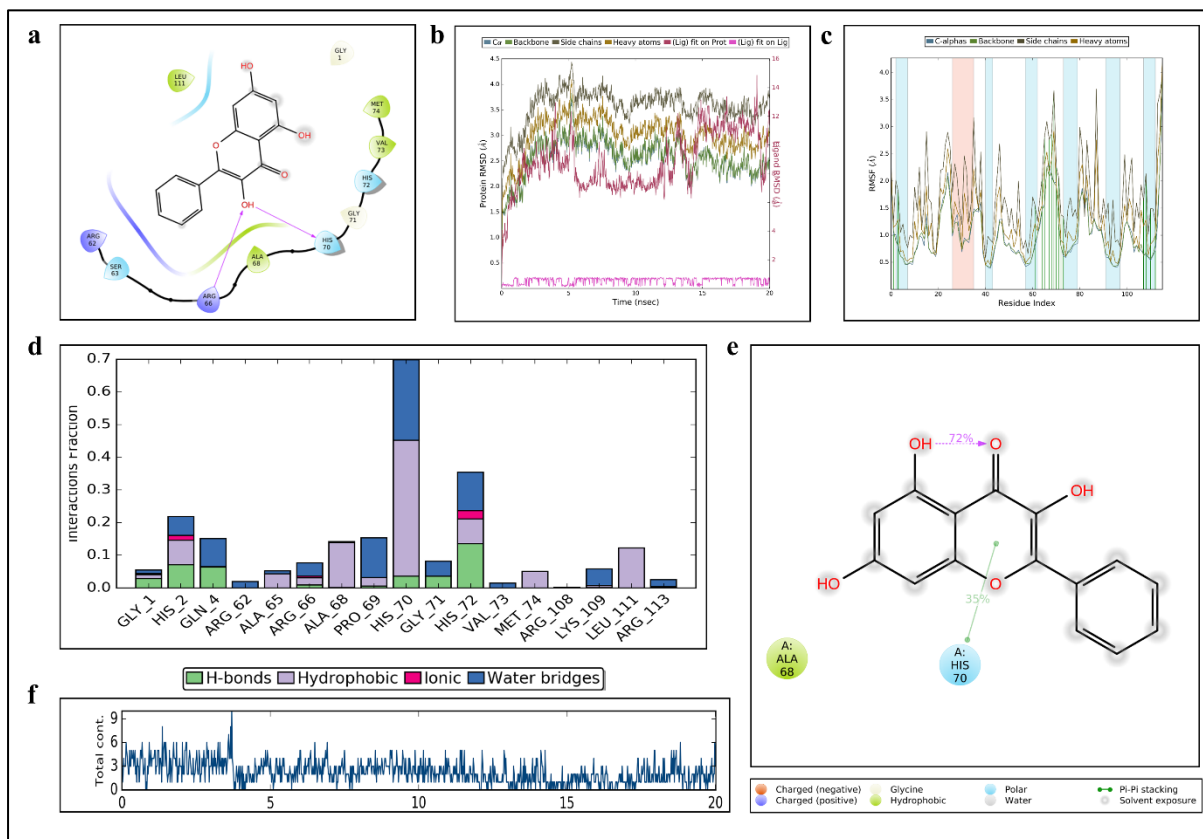

**Supplementary Figure 21:** Docking and MD simulation results for Nsp1-deep-Galangin. **a.** Galangin-Nsp1 interactions after XP docking **b.** Interaction types and Interacting residues of Nsp1 with Galangin over simulation time. Normalized stacked bars indicate the fraction of simulation time for which a particular type of interaction was maintained. Values more than 1.0 suggests that the residue forms multiple interactions of same subtype with ligand (Galangin) **c.** RMSD plot of Nsp1 and Galangin. **d.** Nsp1-RMSF plot **e.** Interaction of Galangin atoms with Nsp1 residues along with types and duration of interactions. Interactions that persist for more than 10% of simulation time has been shown. If a residue forms multiple interaction of same type with the same atom of ligand then that residue can have more than 100% interaction **f.** Total number of contacts (H-bonds, Water bridges, Hydrophobic, Ionic) between Nsp1 and Galangin over the course of MD simulation

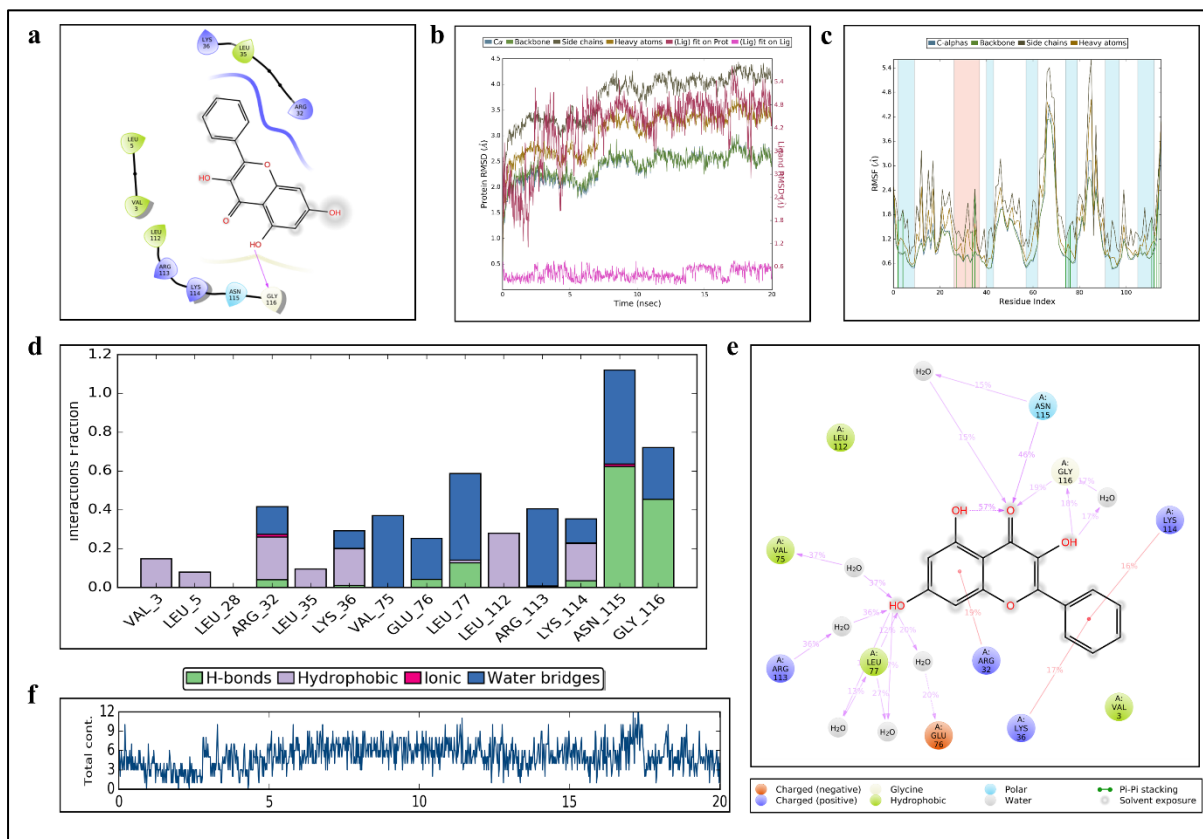

**Supplementary Figure 22:** Docking and MD simulation results for Nsp1-shallow-Galangin. **a.** Galangin -Nsp1 interactions after XP docking **b.** Interaction types and Interacting residues of Nsp1 with Galangin over simulation time. Normalized stacked bars indicate the fraction of simulation time for which a particular type of interaction was maintained. Values more than 1.0 suggests that the residue forms multiple interactions of same subtype with ligand (Galangin) **c.** RMSD plot of Nsp1 and Galangin. **d.** Nsp1-RMSF plot **e.** Interaction of Galangin atoms with Nsp1 residues along with types and duration of interactions. Interactions that persist for more than 10% of simulation time has been shown. If a residue forms multiple interaction of same type with the same atom of ligand then that residue can have more than 100% interaction **f.** Total number of contacts (H-bonds, Water bridges, Hydrophobic, Ionic) between Nsp1 and Galangin over the course of MD simulation

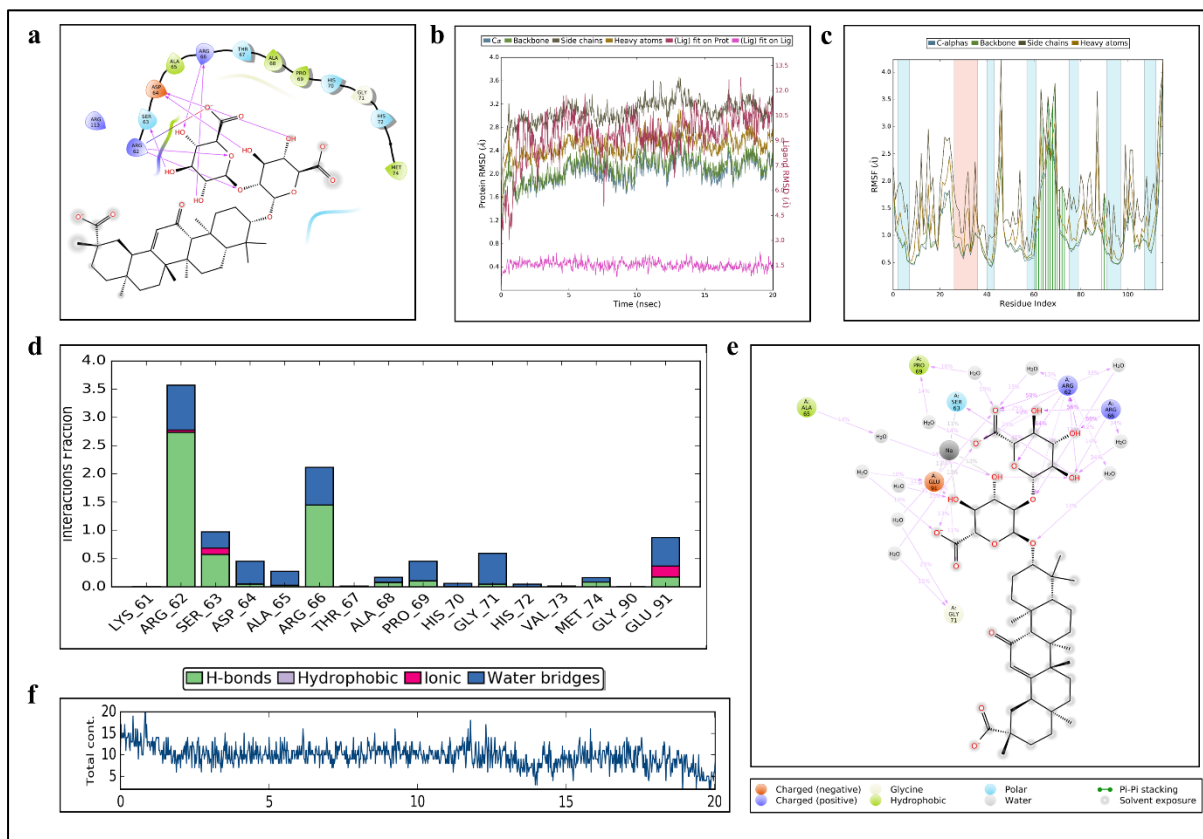

**Supplementary Figure 23:** Docking and MD simulation results for Nsp1-deep-Glycyrrhizic-acid. **a.** Glycyrrhizic-acid -Nsp1 interactions after XP docking **b.** Interaction types and Interacting residues of Nsp1 with Glycyrrhizic-acid over simulation time. Normalized stacked bars indicate the fraction of simulation time for which a particular type of interaction was maintained. Values more than 1.0 suggests that the residue forms multiple interactions of same subtype with ligand (Glycyrrhizic-acid) **c.** RMSD plot of Nsp1 and Glycyrrhizic-acid. **d.** Nsp1-RMSF plot **e.** Interaction of Glycyrrhizic-acid atoms with Nsp1 residues along with types and duration of interactions. Interactions that persist for more than 10% of simulation time has been shown. If a residue forms multiple interaction of same type with the same atom of ligand then that residue can have more than 100% interaction **f.** Total number of contacts (H-bonds, Water bridges, Hydrophobic, Ionic) between Nsp1 and Glycyrrhizic-acid over the course of MD simulation

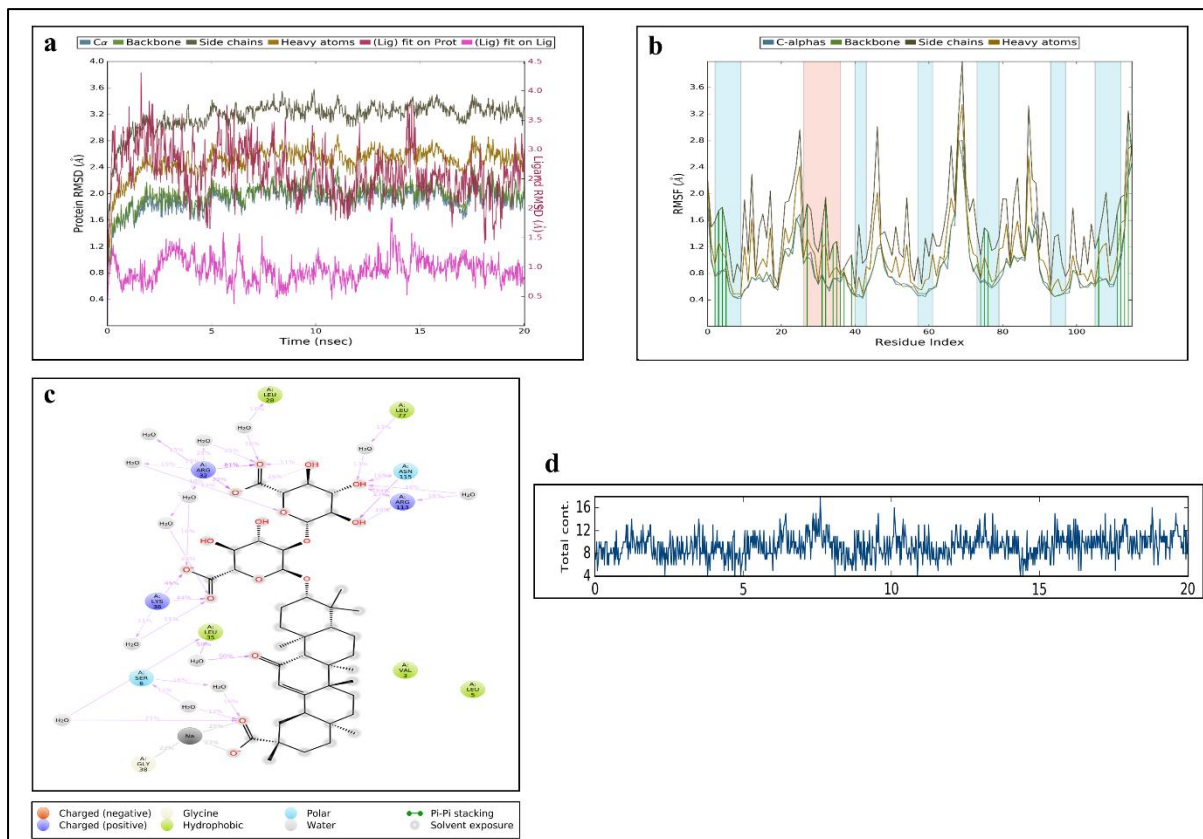

**Supplementary Figure 24:** MD simulation results for Nsp1-shallow-Glycyrrhizic-acid. **a.** RMSD plot of Nsp1 and Glycyrrhizic-acid. **b.** Nsp1-RMSF plot **c.** Interaction of Glycyrrhizic-acid atoms with Nsp1 residues along with types and duration of interactions. Interactions that persist for more than 10% of simulation time has been shown. If a residue forms multiple interaction of same type with the same atom of ligand then that residue can have more than 100% interaction **d.** Total number of contacts (H-bonds, Water bridges, Hydrophobic, Ionic) between Nsp1 and Glycyrrhizic-acid over the course of MD

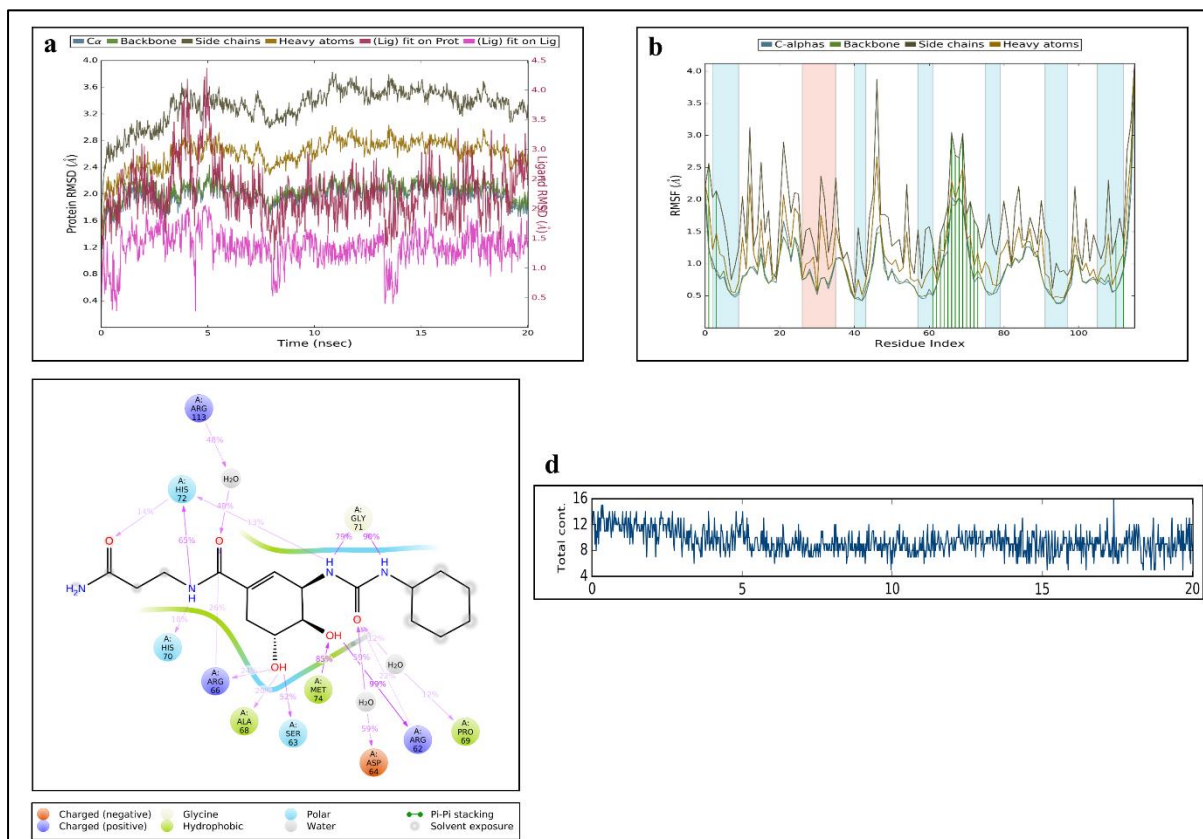

**Supplementary Figure 25:** MD simulation results for Nsp1-deep-SN00003849. **a.** RMSD plot of Nsp1 and SN00003849. **b.** Nsp1-RMSF plot **c.** Interaction of SN00003849 atoms with Nsp1 residues along with types and duration of interactions. Interactions that persist for more than 10% of simulation time has been shown. If a residue forms multiple interaction of same type with the same atom of ligand then that residue can have more than 100% interaction **d.** Total number of contacts (H-bonds, Water bridges, Hydrophobic, Ionic) between Nsp1 and SN00003849 over the course of MD simulation

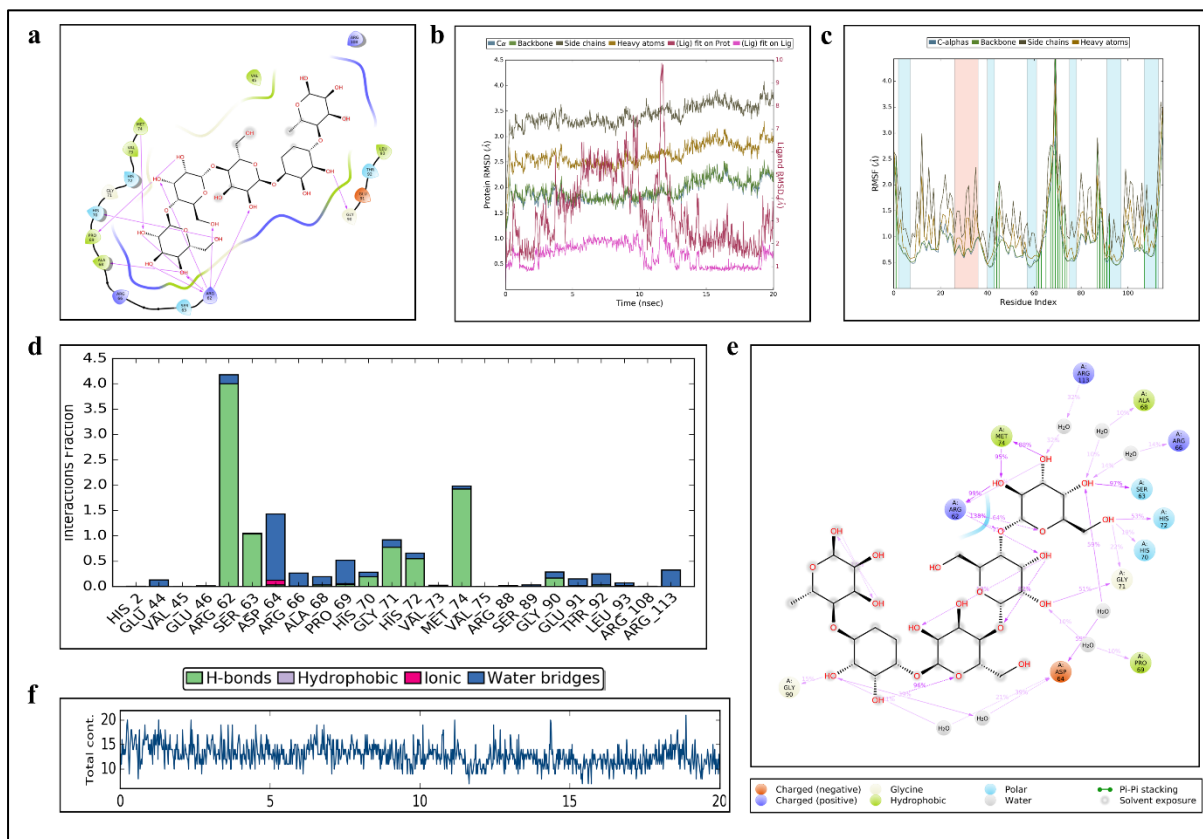

**Supplementary Figure 26:** Docking and MD simulation results for Nsp1-deep-SN00220639. **a.** SN00220639 -Nsp1 interactions after XP docking **b.** Interaction types and Interacting residues of Nsp1 with SN00220639 over simulation time. Normalized stacked bars indicate the fraction of simulation time for which a particular type of interaction was maintained. Values more than 1.0 suggests that the residue forms multiple interactions of same subtype with ligand (SN00220639) **c.** RMSD plot of Nsp1 and SN00220639. **d.** Nsp1-RMSF plot **e.** Interaction of SN00220639 atoms with Nsp1 residues along with types and duration of interactions. Interactions that persist for more than 10% of simulation time has been shown. If a residue forms multiple interaction of same type with the same atom of ligand then that residue can have more than 100% interaction **f.** Total number of contacts (H-bonds, Water bridges, Hydrophobic, Ionic) between Nsp1 and SN00220639 over the course of MD simulation

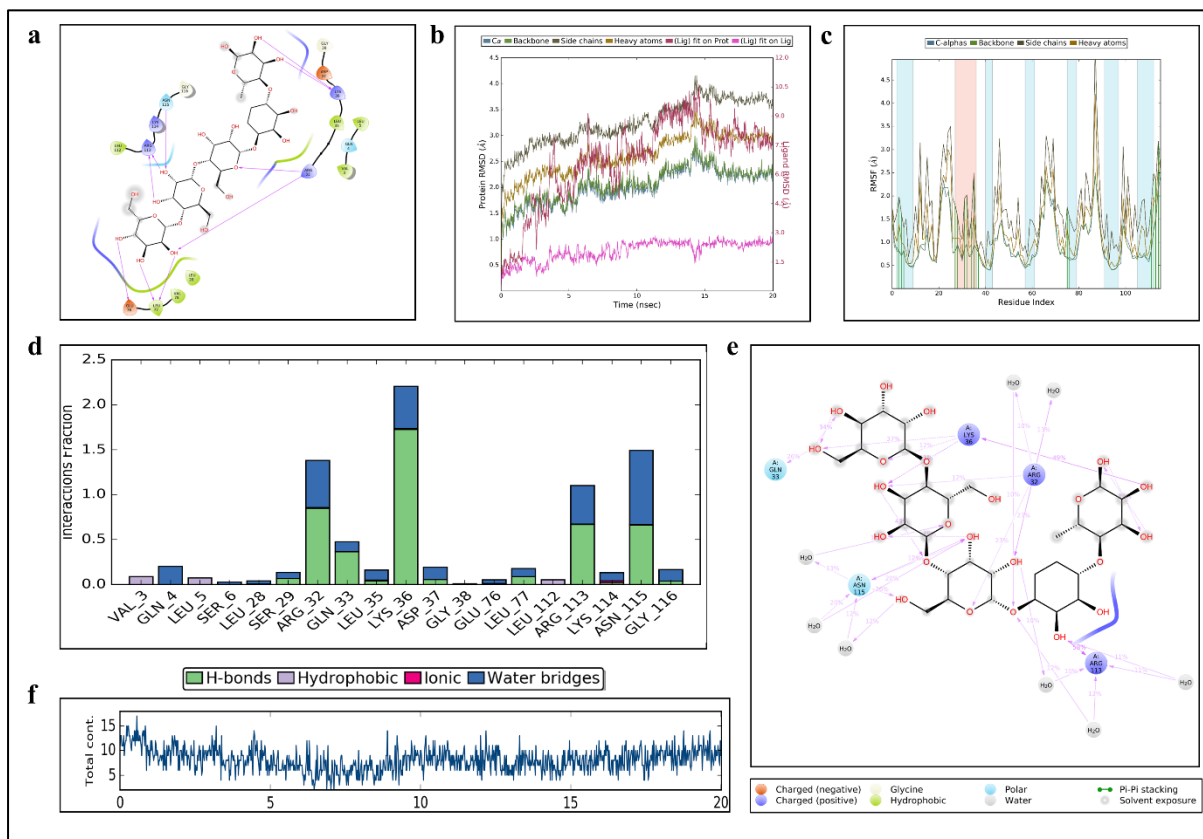

**Supplementary Figure 27:** Docking and MD simulation results for Nsp1-shallow-SN00220639. **a.** SN00220639 -Nsp1 interactions after XP docking **b.** Interaction types and Interacting residues of Nsp1 with SN00220639 over simulation time. Normalized stacked bars indicate the fraction of simulation time for which a particular type of interaction was maintained. Values more than 1.0 suggests that the residue forms multiple interactions of same subtype with ligand (SN00220639) **c.** RMSD plot of Nsp1 and SN00220639. **d.** Nsp1-RMSF plot **e.** Interaction of SN00220639 atoms with Nsp1 residues along with types and duration of interactions. Interactions that persist for more than 10% of simulation time has been shown. If a residue forms multiple interaction of same type with the same atom of ligand then that residue can have more than 100% interaction **f.** Total number of contacts (H-bonds, Water bridges, Hydrophobic, Ionic) between Nsp1 and SN00220639 over the course of MD simulation



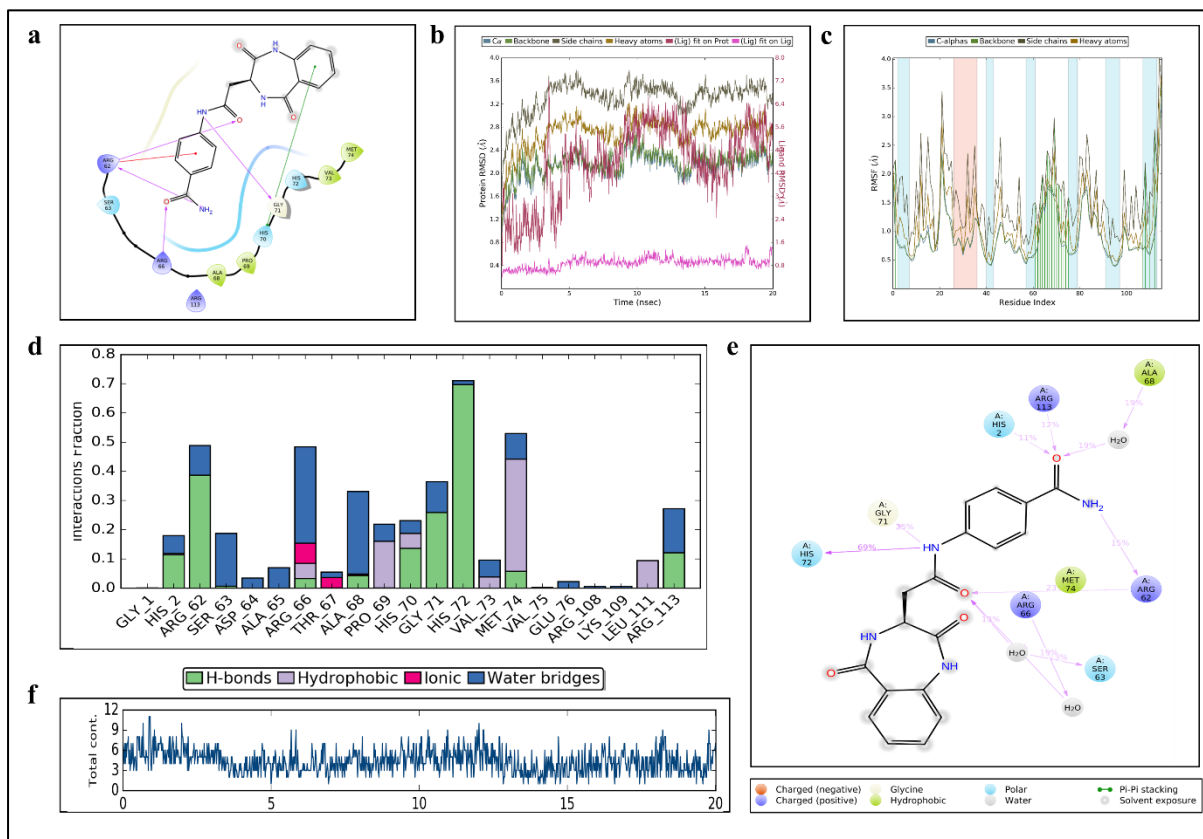

**Supplementary Figure 28:** Docking and MD simulation results for Nsp1-deep-SN00103215. **a.** SN00103215 -Nsp1 interactions after XP docking **b.** Interaction types and Interacting residues of Nsp1 with SN00103215 over simulation time. Normalized stacked bars indicate the fraction of simulation time for which a particular type of interaction was maintained. Values more than 1.0 suggests that the residue forms multiple interactions of same subtype with ligand (SN00103215) **c.** RMSD plot of Nsp1 and SN00103215. **d.** Nsp1-RMSF plot **e.** Interaction of SN00103215 atoms with Nsp1 residues along with types and duration of interactions. Interactions that persist for more than 10% of simulation time has been shown. If a residue forms multiple interaction of same type with the same atom of ligand then that residue can have more than 100% interaction **f.** Total number of contacts (H-bonds, Water bridges, Hydrophobic, Ionic) between Nsp1 and SN00103215 over the course of MD simulation



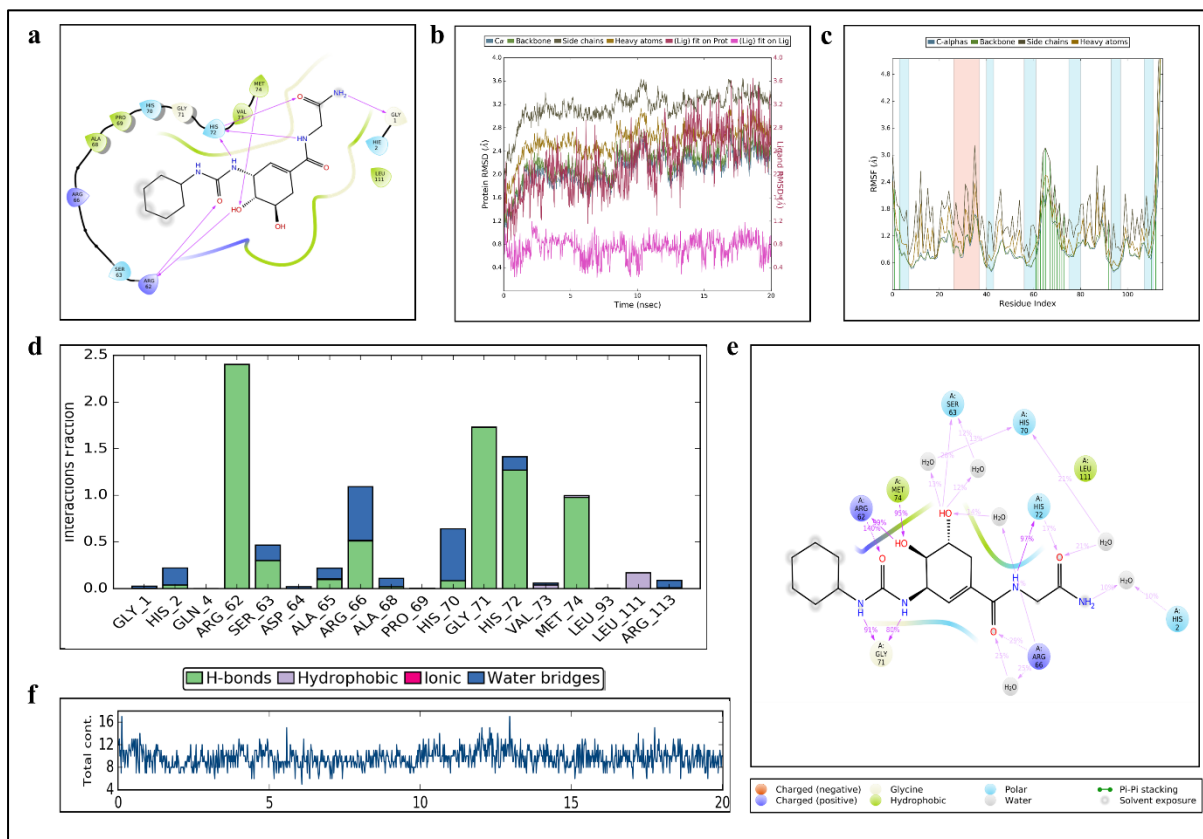

**Supplementary Figure 29:** Docking and MD simulation results for Nsp1-deep-SN00003832. **a.** SN00003832 -Nsp1 interactions after XP docking **b.** Interaction types and Interacting residues of Nsp1 with SN00003832 over simulation time. Normalized stacked bars indicate the fraction of simulation time for which a particular type of interaction was maintained. Values more than 1.0 suggests that the residue forms multiple interactions of same subtype with ligand (SN00003832) **c.** RMSD plot of Nsp1 and SN00003832. **d.** Nsp1-RMSF plot **e.** Interaction of SN00003832 atoms with Nsp1 residues along with types and duration of interactions. Interactions that persist for more than 10% of simulation time has been shown. If a residue forms multiple interaction of same type with the same atom of ligand then that residue can have more than 100% interaction **f.** Total number of contacts (H-bonds, Water bridges, Hydrophobic, Ionic) between Nsp1 and SN00003832 over the course of MD simulation

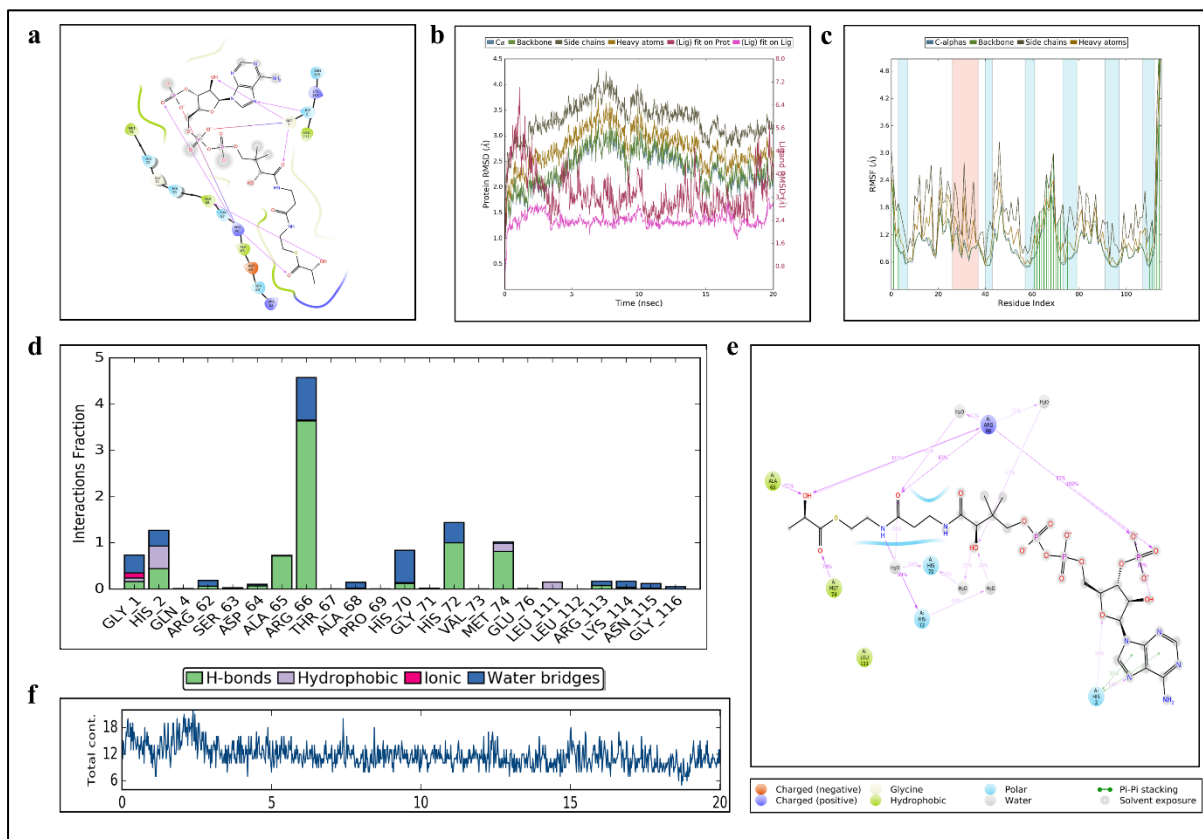

**Supplementary Figure 30:** Docking and MD simulation results for Nsp1-deep-SN00216190. **a.** SN00216190 -Nsp1 interactions after XP docking **b.** Interaction types and Interacting residues of Nsp1 with SN00216190 over simulation time. Normalized stacked bars indicate the fraction of simulation time for which a particular type of interaction was maintained. Values more than 1.0 suggests that the residue forms multiple interactions of same subtype with ligand (SN00216190) **c.** RMSD plot of Nsp1 and SN00216190. **d.** Nsp1-RMSF plot **e.** Interaction of SN00216190 atoms with Nsp1 residues along with types and duration of interactions. Interactions that persist for more than 10% of simulation time has been shown. If a residue forms multiple interaction of same type with the same atom of ligand then that residue can have more than 100% interaction **f.** Total number of contacts (H-bonds, Water bridges, Hydrophobic, Ionic) between Nsp1 and SN00216190 over the course of MD simulation

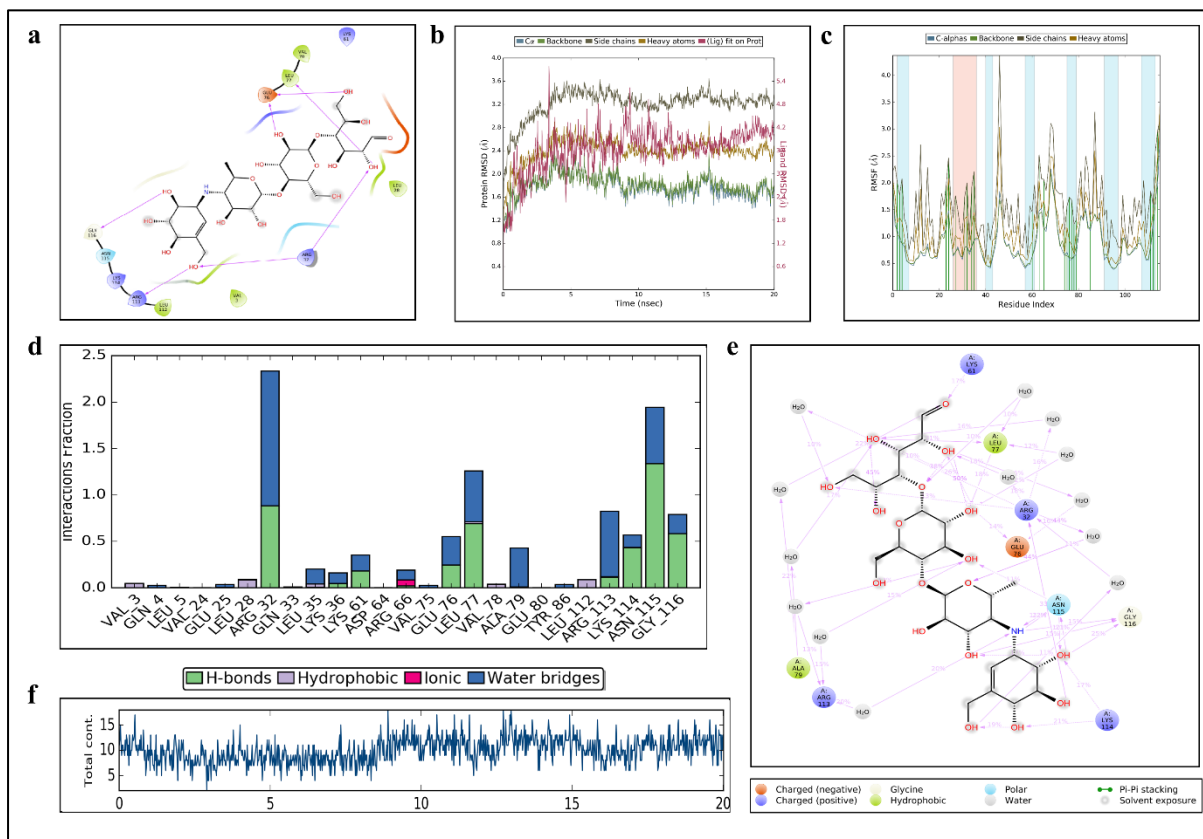

**Supplementary Figure 31:** Docking and MD simulation results for Nsp1-shallow-Acarbose. **a.** Acarbose -Nsp1 interactions after XP docking **b.** Interaction types and Interacting residues of Nsp1 with Acarbose over simulation time. Normalized stacked bars indicate the fraction of simulation time for which a particular type of interaction was maintained. Values more than 1.0 suggests that the residue forms multiple interactions of same subtype with ligand (Acarbose) **c.** RMSD plot of Nsp1 and Acarbose. **d.** Nsp1-RMSF plot **e.** Interaction of Acarbose atoms with Nsp1 residues along with types and duration of interactions. Interactions that persist for more than 10% of simulation time has been shown. If a residue forms multiple interaction of same type with the same atom of ligand then that residue can have more than 100% interaction **f.** Total number of contacts (H-bonds, Water bridges, Hydrophobic, Ionic) between Nsp1 and Acarbose over the course of MD simulation

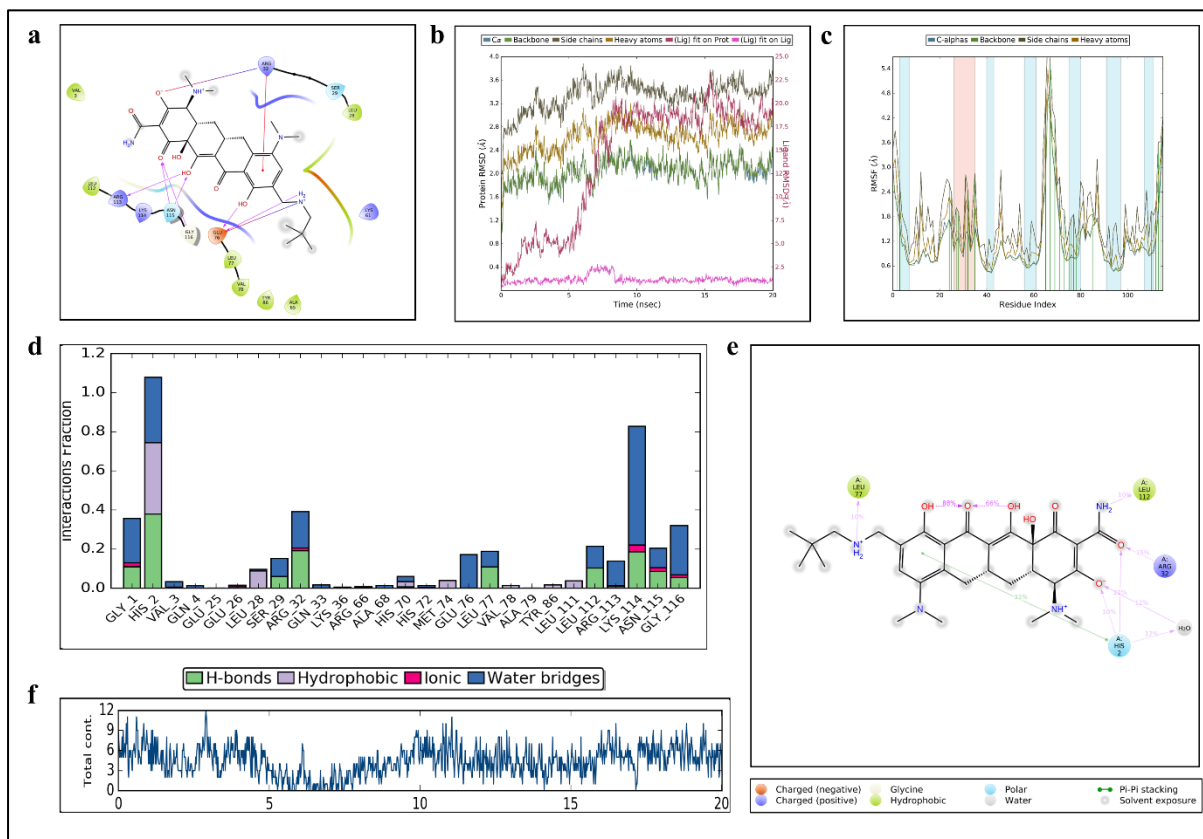

**Supplementary Figure 32:** Docking and MD simulation results for Nsp1-shallow-Omadacycline. **a.** Omadacycline -Nsp1 interactions after XP docking **b.** Interaction types and Interacting residues of Nsp1 with Omadacycline over simulation time. Normalized stacked bars indicate the fraction of simulation time for which a particular type of interaction was maintained. Values more than 1.0 suggests that the residue forms multiple interactions of same subtype with ligand (Omadacycline) **c.** RMSD plot of Nsp1 and Omadacycline. **d.** Nsp1-RMSF plot **e.** Interaction of Omadacycline atoms with Nsp1 residues along with types and duration of interactions. Interactions that persist for more than 10% of simulation time has been shown. If a residue forms multiple interaction of same type with the same atom of ligand then that residue can have more than 100% interaction **f.** Total number of contacts (H-bonds, Water bridges, Hydrophobic, Ionic) between Nsp1 and Omadacycline over the course of MD simulation

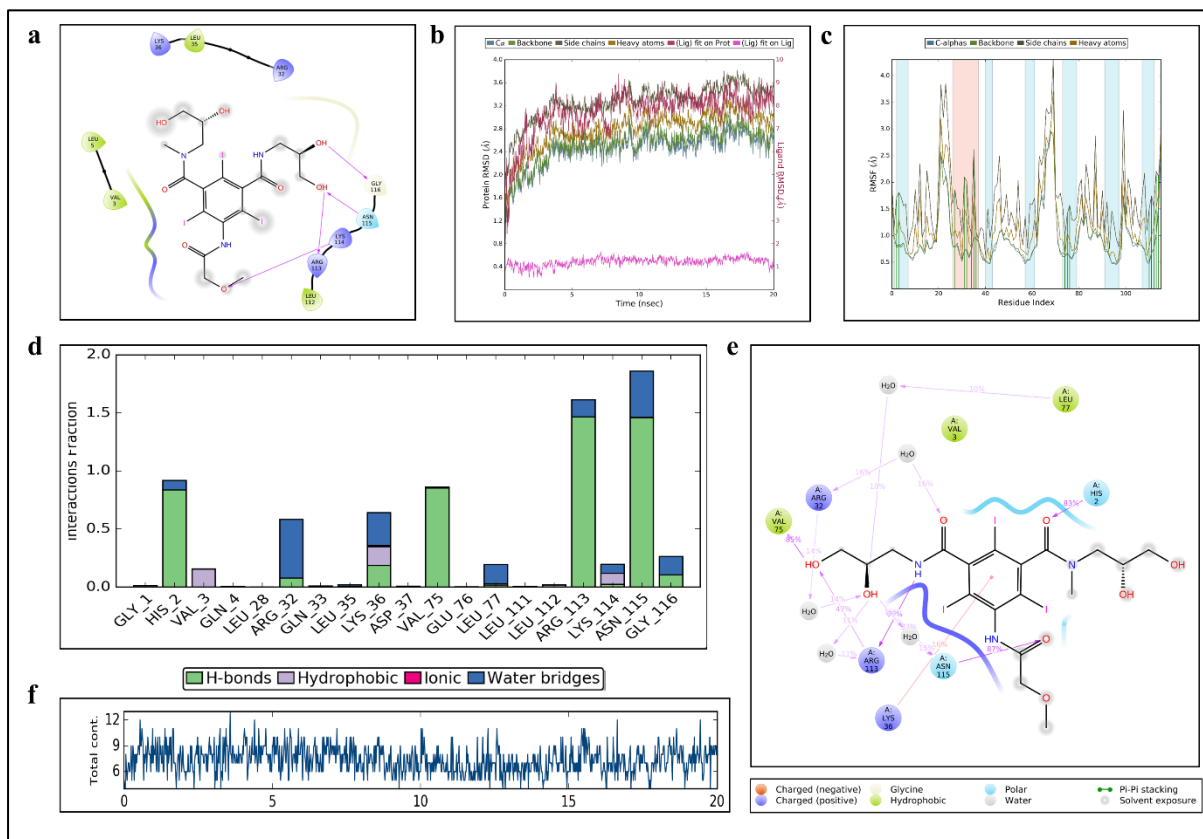

**Supplementary Figure 33: Docking and MD simulation results for Nsp1-shallow-Iopromide. a.** Iopromide -Nsp1 interactions after XP docking **b.** Interaction types and Interacting residues of Nsp1 with Iopromide over simulation time. Normalized stacked bars indicate the fraction of simulation time for which a particular type of interaction was maintained. Values more than 1.0 suggests that the residue forms multiple interactions of same subtype with ligand (Iopromide) **c.** RMSD plot of Nsp1 and Iopromide. **d.** Nsp1-RMSF plot **e.** Interaction of Iopromide atoms with Nsp1 residues along with types and duration of interactions. Interactions that persist for more than 10% of simulation time has been shown. If a residue forms multiple interaction of same type with the same atom of ligand then that residue can have more than 100% interaction **f.** Total number of contacts (H-bonds, Water bridges, Hydrophobic, Ionic) between Nsp1 and Iopromide over the course of MD simulation

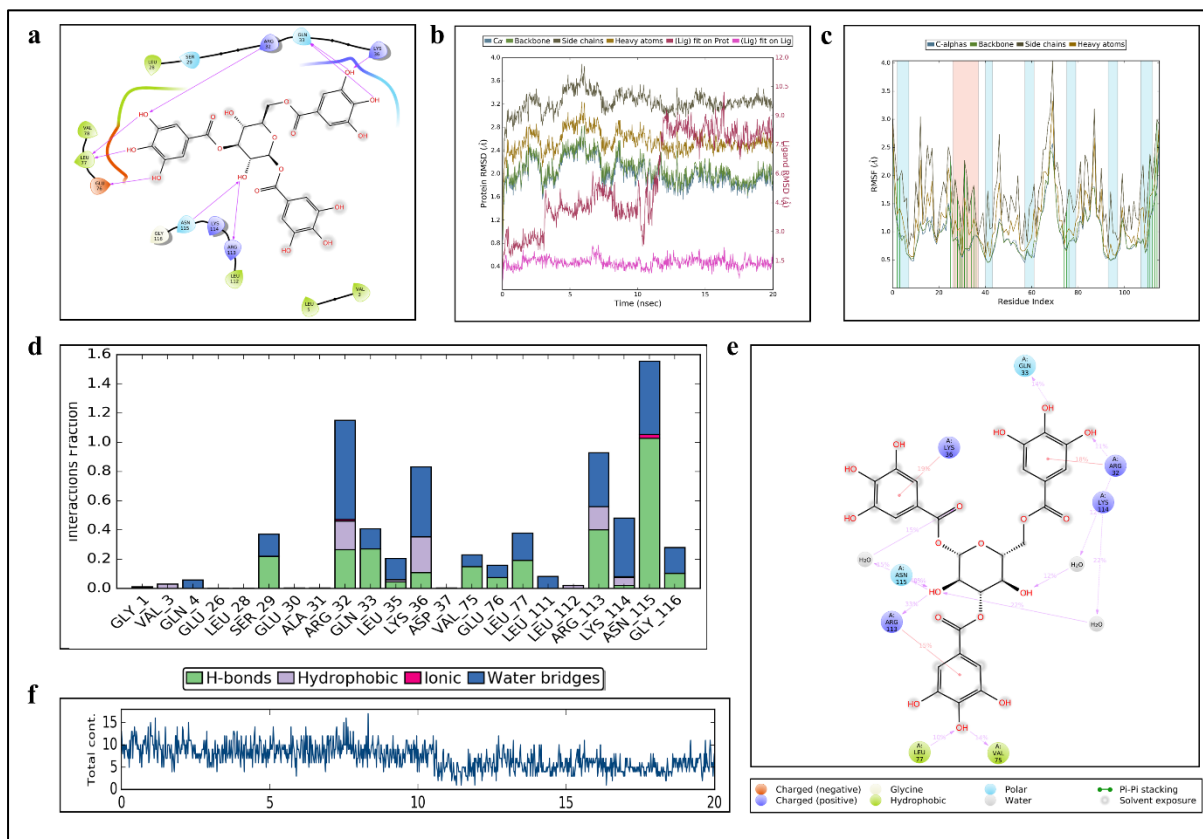

**Supplementary Figure 34:** Docking and MD simulation results for Nsp1-shallow-SN00037405. **a.** SN00037405 -Nsp1 interactions after XP docking **b.** Interaction types and Interacting residues of Nsp1 with SN00037405 over simulation time. Normalized stacked bars indicate the fraction of simulation time for which a particular type of interaction was maintained. Values more than 1.0 suggests that the residue forms multiple interactions of same subtype with ligand (SN00037405) **c.** RMSD plot of Nsp1 and SN00037405. **d.** Nsp1-RMSF plot **e.** Interaction of SN00037405 atoms with Nsp1 residues along with types and duration of interactions. Interactions that persist for more than 10% of simulation time has been shown. If a residue forms multiple interaction of same type with the same atom of ligand then that residue can have more than 100% interaction **f.** Total number of contacts (H-bonds, Water bridges, Hydrophobic, Ionic) between Nsp1 and SN00037405 over the course of MD simulation

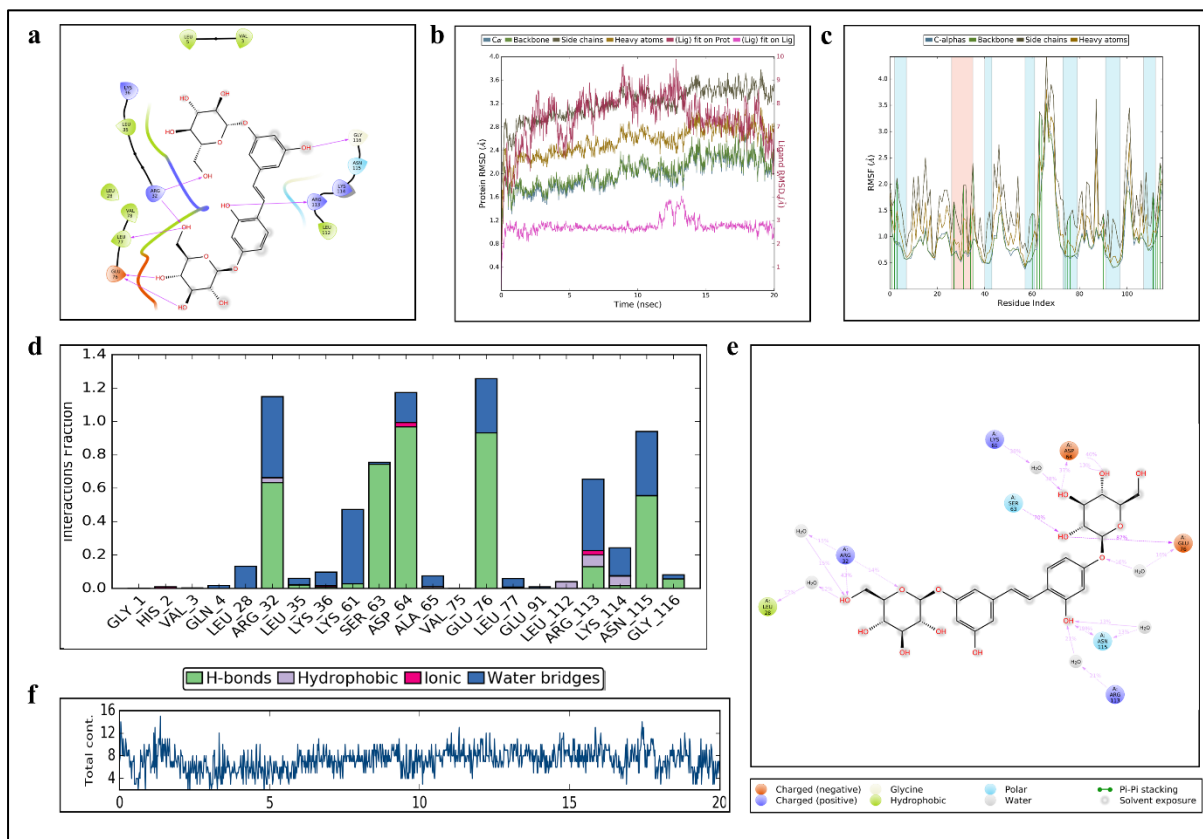

**Supplementary Figure 35:** Docking and MD simulation results for Nsp1-shallow-SN00161170. **a.** SN00161170 -Nsp1 interactions after XP docking **b.** Interaction types and Interacting residues of Nsp1 with SN00161170 over simulation time. Normalized stacked bars indicate the fraction of simulation time for which a particular type of interaction was maintained. Values more than 1.0 suggests that the residue forms multiple interactions of same subtype with ligand (SN00161170) **c.** RMSD plot of Nsp1 and SN00161170. **d.** Nsp1-RMSF plot **e.** Interaction of SN00161170 atoms with Nsp1 residues along with types and duration of interactions. Interactions that persist for more than 10% of simulation time has been shown. If a residue forms multiple interaction of same type with the same atom of ligand then that residue can have more than 100% interaction **f.** Total number of contacts (H-bonds, Water bridges, Hydrophobic, Ionic) between Nsp1 and SN00161170 over the course of MD simulation



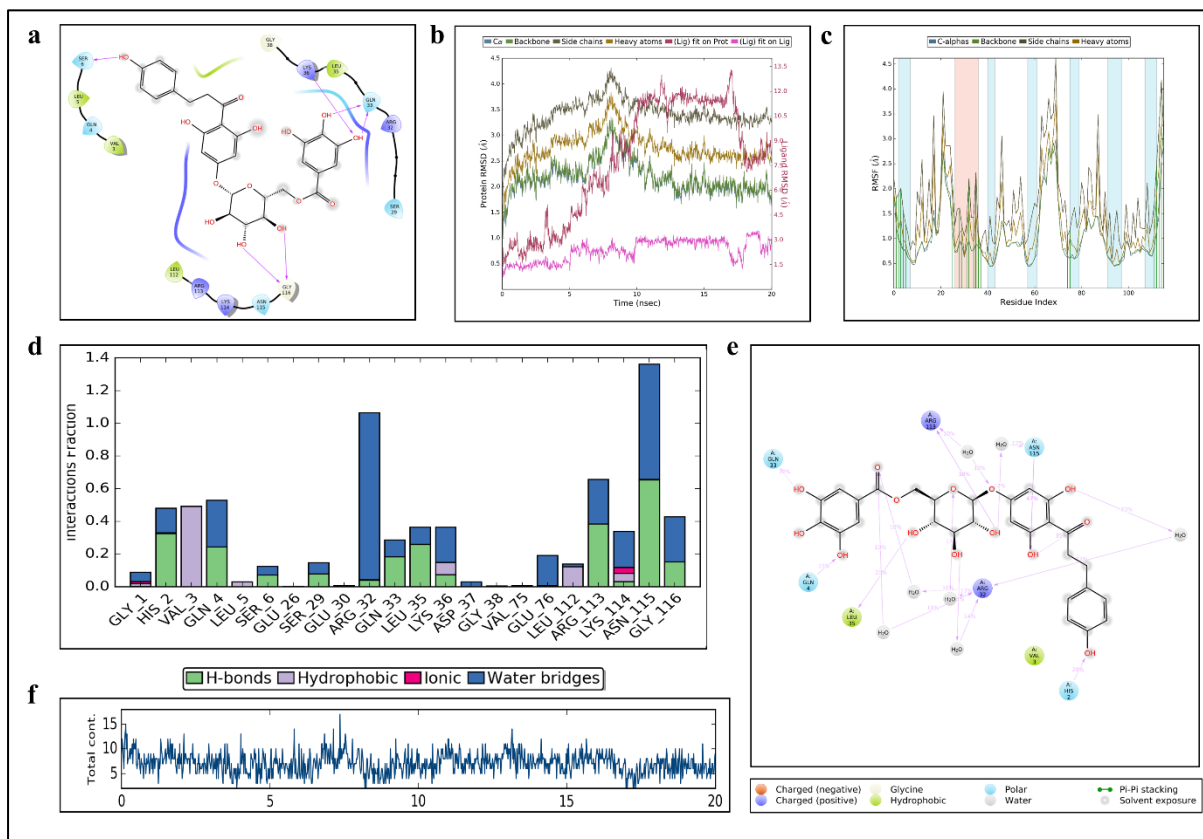

**Supplementary Figure 36:** Docking and MD simulation results for Nsp1-shallow-SN00038342. **a.** SN00038342 -Nsp1 interactions after XP docking **b.** Interaction types and Interacting residues of Nsp1 with SN00038342 over simulation time. Normalized stacked bars indicate the fraction of simulation time for which a particular type of interaction was maintained. Values more than 1.0 suggests that the residue forms multiple interactions of same subtype with ligand (SN00038342) **c.** RMSD plot of Nsp1 and SN00038342. **d.** Nsp1-RMSF plot **e.** Interaction of SN00038342 atoms with Nsp1 residues along with types and duration of interactions. Interactions that persist for more than 10% of simulation time has been shown. If a residue forms multiple interaction of same type with the same atom of ligand then that residue can have more than 100% interaction **f.** Total number of contacts (H-bonds, Water bridges, Hydrophobic, Ionic) between Nsp1 and SN00038342 over the course of MD simulation



**Supplementary Table 1: ADME properties of SNDB compounds**

| Title      | #stars | CNS | MW      | donorHB | acctpHB | QPlogPo/w | QPlogS | QPPCaco  | QPlogBB | QPPMDCK | % Human Oral Absorption | Rule of Five |
|------------|--------|-----|---------|---------|---------|-----------|--------|----------|---------|---------|-------------------------|--------------|
| SN00103215 | 0      | -2  | 352.349 | 4       | 9       | 0.309     | -3.779 | 19.11    | -2.5    | 6.864   | 51.689                  | 0            |
| SN00003832 | 2      | -2  | 354.405 | 6.25    | 9.65    | -1.413    | -1.811 | 4.532    | -3.084  | 5.284   | 17.46                   | 1            |
| SN00003849 | 1      | -2  | 368.432 | 6       | 9.4     | -0.953    | -2.201 | 4.866    | -3.198  | 5.599   | 20.707                  | 1            |
| SN00220639 | 16     | -2  | 780.727 | 15      | 39.1    | -7.721    | 0.357  | 0.223    | -6.585  | 0.056   | 0                       | 3            |
| SN00216190 | 14     | -2  | 839.597 | 8       | 29.8    | -2.808    | 0.261  | 0.001    | -6.879  | 0       | 0                       | 3            |
| SN00037405 | 10     | -2  | 636.476 | 11      | 17.85   | -2.664    | -3.525 | 0.022    | -7.813  | 0.005   | 0                       | 3            |
| SN00038342 | 9      | -2  | 588.521 | 7       | 14.05   | 0.027     | -4.607 | 0.279    | -6.407  | 0.071   | 0                       | 3            |
| SN00161170 | 10     | -2  | 568.53  | 10      | 20      | -2.468    | -2.32  | 1.177    | -5.335  | 0.337   | 0                       | 3            |
| SN00156190 | 0      | -2  | 356.418 | 2       | 5       | 3.803     | -5.101 | 380.868  | -1.678  | 174.267 | 95.401                  | 0            |
| SN00002189 | 0      | -1  | 276.375 | 1       | 3.5     | 3.765     | -4.046 | 1441.646 | -0.874  | 734.611 | 100                     | 0            |

**# Stars:** Number of properties which do not fall in 95% range of similar values for known drugs; **CNS:** Central nervous system activity with -2 being inactive and 2 being active; **MW:** Molecular Weight; **donorHB:** Number of H-bond donors; **acctpHB:** Number of H-bond acceptors; **QPlogPo/w:** Partition coefficient for octanol/water; **QPlogS:** Aqueous solubility with acceptable range of -6.5-0.5; **QPPCaco:** Caco-2 cell permeability in nm/sec (<25 is poor and >500 is great); **QPlogBB:** Brain/blood partition coefficient for orally delivered drugs (-3.0-1.2); **QPPMDCK:** apparent MDCK cell permeability in nm/sec (<25 is poor and >500 is great); **Rule Of Five:** Lipinski's rule of 5
